1 **Interaction of modified oligonucleotides with nuclear proteins, formation of novel**  
2 **nuclear structures and sequence-independent effects on RNA processing**

3  
4 Loren L Flynn #, Ruohan Li # May T Aung-Htut, Ianthe L Pitout, Jack A L Cooper, Alysia  
5 Hubbard, Lisa Griffiths, Charlie Bond, Steve D Wilton, Archa H Fox\* and Sue Fletcher\*

6 **# authors contributed equally**

7 **\*corresponding authors**

8  
9 **Abstract (max 150 words)**

10 Oligonucleotides and nucleic acid analogues that alter gene expression are showing  
11 therapeutic promise for selected human diseases. The modification of synthetic nucleic acids  
12 to protect against nuclease degradation and to influence drug function is common practice,  
13 however, such modifications may also confer unexpected physicochemical and biological  
14 properties. Here we report backbone-specific effects of modified oligonucleotides on  
15 subnuclear organelles, altered distribution of nuclear proteins, the appearance of novel  
16 structured nuclear inclusions, and modification of RNA processing in cultured cells  
17 transfected with antisense oligonucleotides on a phosphorothioate backbone. Phosphodiester  
18 and phosphorodiamidate morpholino oligomers elicited no such consequences. Disruption  
19 of subnuclear structures and proteins elicit severe phenotypic disturbances, revealed by  
20 transcriptomic analysis of fibroblasts exhibiting such disruption. These data suggest that the  
21 toxic effects and adverse events reported after clinical evaluation of phosphorothioate  
22 nucleic acid drugs may be mediated, at least in part, by non-specific interaction of nuclear  
23 components with the phosphorothioate backbone.

24  
25  
26 **Key Words**

27 Antisense oligonucleotides, RNA analogue, RNA processing, paraspeckle proteins, nuclear  
28 organelles

29  
30 **Abbreviations**

31 antisense oligonucleotide (AO), spinal muscular atrophy (SMA), Duchenne muscular  
32 dystrophy (DMD) phosphorodiamidate morpholino oligomer (PMO) amyotrophic lateral  
33 sclerosis (ALS)

34

## 35 Introduction

36

37 Antisense oligonucleotide drugs are a class of therapeutics designed to alter gene expression  
38 and function, and are reported to have delivered therapeutic benefit to spinal muscular  
39 atrophy (SMA) type 1 patients (Paton 2017) and a subset of Duchenne muscular dystrophy  
40 (DMD) cases (Mendell *et al.* 2013, Mendell *et al.* 2016). *Nusinersen* (*Spinraza*) is a 2' O-  
41 methoxyethyl antisense oligonucleotide (AO) on a phosphorothioate backbone, targeting  
42 a splice silencer (*ISS-NI*) in *SMN2* intron 7 that promotes exon 7 selection during pre-  
43 mRNA splicing (Singh *et al.* 2006) and received Food and Drug Administration (USA) (FDA)  
44 approval in December 2016 for the treatment of SMA. *Exondys51* is a phosphorodiamidate  
45 morpholino oligomer (PMO) that targets the *DMD* pre-mRNA to exclude exon 51, in order to  
46 re-frame the dystrophin transcript around frame shifting deletions flanking exon 51, as a  
47 treatment for DMD (Mendell *et al.* 2013). *Exondys51* received accelerated approval from the  
48 FDA on September 19<sup>th</sup> 2016. Other drugs exploiting the antisense concept include  
49 Kynamro<sup>®</sup> (mipomersen sodium) (Wong and Goldberg 2014), an adjunctive treatment to  
50 reduce LDL-C levels in familial hypercholesteremia, approved in January 2013, followed by  
51 an FDA hepatotoxicity black box warning; and a number of compounds at various stages of  
52 clinical development, predominantly siRNA and oligodeoxyribonucleotide analogues  
53 designed to induce RNase H degradation of target transcripts (for review see (Bennett *et al.*  
54 2017, Stein and Castanotto 2017)). Recently, Alnylam announced the first FDA approval of  
55 an RNAi Therapeutic, ONPATRO™ (patisiran) for the treatment of adult patients with  
56 polyneuropathy of hereditary transthyretin-mediated amyloidosis.  
57 (<https://www.fda.gov/NewsEvents/Newsroom/PressAnnouncements/ucm616518.htm>)

58

59 Strategies to improve biological stability and confer pharmaceutical properties to nucleic acid  
60 drugs include chemical modifications of the bases and nucleic acid backbone to increase  
61 resistance to endogenous nucleases; modifications that influence specific oligomer activity  
62 and conjugates that enhance cellular uptake and improve tissue distribution. While the  
63 phosphorothioate backbone is the most widely applied chemical modification, changes to the  
64 ribose moiety (eg, 2' O-methylation, 2' O-methoxyethyl, 2' O-fluoro), nucleobases and other  
65 backbone modifications, including peptide nucleic acids and phosphorodiamidate morpholino  
66 oligomers can confer specific characteristics and mechanisms of action (for review see (Veedu  
67 2015, Wilton *et al.* 2015, Tri Le *et al.* 2016)).

68  
69 Many laboratories, including our own, routinely use 2' O-methyl phosphorothioate  
70 oligonucleotides to evaluate antisense sequences for targeted splicing modulation, and  
71 different modified bases on a phosphorothioate backbone for various other molecular  
72 interventions (Lipi *et al.* 2016, Chakravarthy *et al.* 2017). These compounds can be  
73 economically prepared in-house and efficiently transfected into a range of cells as cationic  
74 liposomes or dendrimer complexes, using commercially available reagents. However, for  
75 sustained splice modification, *in vivo* use and clinical application, PMOs have proved safe  
76 and effective (Gebbski *et al.* 2003, Fletcher *et al.* 2006, Kinali *et al.* 2009, Mendell *et al.*  
77 2016). We previously reported that antisense exon skipping sequences prepared and  
78 optimized *in vitro* as 2' O-methyl phosphorothioate oligonucleotides generally perform  
79 comparably when synthesized as PMO (Adams *et al.* 2007). An extended antisense sequence  
80 targeting the *ISS-N1* region of *SMN2* was validated *in vitro* and *in vivo* using 2' O-methyl  
81 phosphorothioate and PMO chemistries (Mitrpant *et al.* 2013).

82  
83 Phosphorothioate backbone modification of nucleic acid drugs is common practice for  
84 protection from rapid degradation by circulating and intracellular nucleases, but these  
85 modified AOs can interact undesirably with endogenous cellular components. Early work  
86 indicated that negatively charged phosphorothioate AOs bind non-specifically to heparin-  
87 like proteins, laminin and collagen (Dias and Stein 2002) and more recently,  
88 phosphorothioate AOs were reported to interact with nuclear paraspeckle-associated  
89 proteins, sequestering them away from their endogenous target, the long non-coding RNA  
90 *NEAT1*, and also seeding paraspeckle like-structures in the absence of *NEAT1* (Shen *et al.*  
91 2014, Shen *et al.* 2015). Paraspeckles and paraspeckle proteins are involved in  
92 transcriptional regulation, transport and splicing pathways (Bond and Fox 2009,  
93 Naganuma *et al.* 2012). Beyond the paraspeckle-associated subset (Shen *et al.* 2014),  
94 phosphorothioate AOs were also reported to bind an additional approximately 50  
95 intracellular proteins (Liang *et al.* 2015) however, these interactions were studied in the  
96 context of evaluating the modest impact these interactions had on AO function (Liang *et al.*  
97 2015). A broader question relates to the global consequences on cellular processes arising as  
98 a result of the interaction of AOs with nuclear proteins.

99  
100 Results of *in vivo* studies investigating the consequences of non-specific phosphorothioate  
101 AO binding are particularly relevant when considering therapeutic applications. The

102 sequestration of paraspeckle proteins, in particular proteins of the drosophila  
103 behaviour/human splicing (DBHS) family, was associated with acute hepatotoxicity,  
104 inflammation and apoptosis after application of 2' fluoro-modified phosphorothioate  
105 antisense oligonucleotides with a 5-10-5 gapmer configuration in mice (Shen *et al.* 2018)  
106 and while this study focused on the severity of 2' fluoro-modified phosphorothioate AOs, all  
107 2' modifications evaluated have been shown to sequester paraspeckle proteins, albeit to  
108 varying degrees (Shen *et al.* 2014, Liang *et al.* 2015, Shen *et al.* 2018). The backbone-  
109 dependent binding of phosphorothioate-modified oligonucleotides to platelets *in vitro* and *in*  
110 *vivo*, mediated by the platelet-specific receptor glycoprotein VI (GPVI) is also of note (Flierl  
111 *et al.* 2015), considering the broad range of nucleic acid therapeutics currently under  
112 investigation (for review see (Bennett *et al.* 2017). Oligonucleotides on a phosphorothioate-  
113 modified backbone elicited strong platelet activation, signaling, reactive oxygen species  
114 generation, adhesion, spreading, aggregation and thrombus formation (Flierl *et al.* 2015). Of  
115 particular relevance to current clinical usage, 2' O-methyl phosphorothioate AOs were  
116 reported to activate innate immunity when administered directly to the central nervous  
117 system (Toonen *et al.* 2018).

118  
119 Here we report that transfection of cultured cells with 2' O-methyl phosphorothioate  
120 antisense sequences resulted in numerous novel, large nuclear inclusions in the form of  
121 highly structured fibril-like aggregates that co-stained for the paraspeckle proteins, NONO,  
122 SFPQ, PSPC1 and FUS. Other nuclear proteins showed altered distribution in 2' O-methyl  
123 phosphorothioate transfected cells. Intranuclear inclusions begin to form within four hours of  
124 transfection, and become dominant structures throughout the nucleus within 24 hours. The  
125 inclusions appear stable once formed and may remain evident on the culture substrate, even  
126 after death and disintegration of the cell. Transmission electron microscopy on transfected  
127 cells revealed numerous large, regular structures reminiscent of amyloid deposits, with  
128 electron dense regions. Furthermore, gene ontology analyses following RNA sequencing  
129 demonstrated significant disruptions to chromatin silencing; regulation of autophagy;  
130 nucleotide excision repair; membrane and organelle organization; apoptosis; signalling and  
131 protein transmembrane transport, following 2' O-methyl phosphorothioate transfection.

132

133

134 **Materials and Methods**

135

136 *Antisense oligonucleotides*

137 Phosphorodiamidate morpholino oligomers (PMOs) were purchased from Gene-Tools LLC  
138 (Philomath, OR, USA), and 2' O-methyl phosphorothioate AOs were synthesised by TriLink  
139 BioTechnologies (San Diego CA, USA). The following sequences were evaluated; an AO  
140 encompassing the *SMN* intron 7 *ISS-NI* target, but with a longer sequence *SMN7D(-10-29)*  
141 (5'AUUCACUUUCAUAAUGCUGG 3'); the Gene-Tools standard control oligomer, only  
142 known to be biologically active in reticulocytes carrying a splice mutation in the human beta-  
143 globin pre-mRNA, as an unrelated sham control AO sequence  
144 (5'CCUCUUACCUCAGUUACAAUUUAUA 3'), and identified as 'control AO' throughout  
145 this study; *Smn* (5' CAC CUU CCU UCU UUU UGA UU 3') designed to induce exon mouse  
146 *Smn* exon skipping and a *SMN* sense AO (5' CCAGCAUUAUGAAAGUGAAU 3')  
147 complementary to *SMN7D(-10-29)*.

148

149 *Transfection*

150 The 2' O-methyl phosphorothioate AOs were transfected into dermal fibroblasts as lipoplexes  
151 using 3 µl of Lipofectamine 3000 (Life Technologies, Melbourne, Australia) per 1 ml of  
152 OptiMEM, according to the manufacturer's protocol. The transfection mix was applied to  
153 cells seeded at 10,000 per cover slip for immunofluorescence and 15,000 cells per well in 24  
154 well plates for RNA extraction and incubated (37°C) for 24 hours prior to RNA and protein  
155 analysis. SMA patient fibroblasts were used for the experiments shown in Figures 1f and 1g  
156 (Coriell Cell Repositories, GM03813) and fibroblasts from our in-house biobank, obtained  
157 from a healthy volunteer, with informed consent (Murdoch University Human Research  
158 Ethics Committee Approval #2013/156) were used for all other experiments, except live-cell  
159 imaging (see below).

160

161 PMOs were delivered to cells either uncomplexed (10 µM), annealed to a complementary  
162 sense DNA oligonucleotide (phosphodiester leash) and transfected as a lipoplex (200 nM), or  
163 by nucleofection using a Nucleofector<sup>TM</sup> X Unit (Lonza, Melbourne, Australia) according to  
164 the manufacturer's instructions. PMOs were delivered using the P2 nucleofection kit and CA-  
165 137 program at 1 µM, as determined by the final transfection volume. All PMO transfections  
166 were incubated for 72 hours prior to RNA and protein analysis.

167

168 *RT-PCR on AO transfected cells*

169 RNA was extracted using the MagMAX-96 Total RNA Isolation Kit, including DNase

170 treatment (Life Technologies), according to the manufacturer's instructions. RT-PCRs were  
171 performed using the One-step Superscript III RT-PCR kit with Platinum Taq polymerase (Life  
172 Technologies) according to the manufacturer's instructions. All primer sequences and PCR  
173 conditions used in this study are detailed in Supplementary File 1, **Table 1**.

174

#### 175 *cDNA synthesis and quantitative PCR*

176 cDNA was synthesised from (~500 ng) RNA extracted from treated and untreated cell cultures  
177 using the Superscript IV first-strand synthesis system (Life Technologies) as per the  
178 manufacturer's instructions. Prior to qPCR amplification, cDNA was diluted in RNase/DNase  
179 free water (1:5).

180

181 The qPCR reactions were performed using Fast SYBR™ Green Master Mix (ThermoFisher  
182 Scientific, Melbourne, Australia) and primers for ribosomal RNA subunits *5S* (100% primer  
183 efficiency), *18S* (95% primer efficiency), *45S* (100% primer efficiency) and housekeeping Tata  
184 box protein (*TBP*; 100% primer efficiency) and beta Tubulin (*TUBB*; 94% primer efficiency)  
185 transcripts. All primer sequences and cycling conditions used in this study are detailed in  
186 Supplementary File 1, **Table 1**. Transcript abundance was measured using the CFX384 Touch™  
187 Real Time PCR detection system (Bio-Rad Laboratories Pty., Ltd., Gladesville, Australia). The  
188 relative expression of each ribosomal RNA subunit to *TBP* and *TUBB* mRNA was calculated  
189 using the  $2^{-\Delta\Delta CT}$  method and presented as a fold change compared to untreated cells.

190

#### 191 *Immunofluorescence*

192

193 Approximately 10,000 fibroblasts were seeded onto 22 mm x 22 mm coverslips in  
194 6-well plates and incubated for 24 hours, prior to transfection. Following transfection,  
195 the cells were fixed using acetone:methanol (1:1) on ice for 4 minutes and air-dried.

196

197

198 Fixed cells were washed in PBS containing 1% Triton X-100 to permeabilise the  
199 nuclear membrane, and then in PBS to remove excess Triton X-100. Primary antibodies  
200 were diluted in PBS containing 0.05% Tween20 and applied to cells for 1 hour at room  
201 temperature. All antibody details and staining conditions are listed in Supplementary File  
202 1 **Table 2**. Primary antibodies were detected using AlexaFluor488 anti-mouse (cat no.  
203 A11001), anti-rabbit (cat. No A11008) or AlexaFluor568 anti-mouse (cat. No A11004) or  
204 anti-rabbit (cat. No A11011) (1:400) after incubation for 1 hour at room temperature, and

205 counterstained with Hoechst 33342 (Sigma-Aldrich) for nuclei detection (1 mg/ml, diluted  
206 1:125).

207

### 208 *Western blotting*

209 Cell lysates were prepared with 125 mM Tris/HCl pH 6.8, 15% SDS, 10% Glycerol, 1.25  $\mu$ M  
210 PMSF (Sigma-Aldrich, NSW, Australia and 1x protease inhibitor cocktail (Sigma-Aldrich)  
211 and sonicated 6 times (1 second pulses) before adding bromophenol blue (0.004%) and  
212 dithiothreitol (2.5 mM). Samples were heated at 94°C for 5 minutes, cooled on ice and  
213 centrifuged at 14,000 x g for 2 min before loading onto the gel.

214

215 Total protein (10  $\mu$ g), measured by BCA, was loaded per sample on a NuPAGE Novex 4-12%  
216 BIS/Tris gel (Life Technologies) and separated at 200 V for 55 minutes. Proteins were  
217 transferred onto a Pall Fluorotrans polyvinylidene fluoride (PVDF) membrane at 350 mA for  
218 2 hours. Following blocking for 1 hour, the membrane was incubated in 5% skim milk  
219 powder in 1x TBST containing the primary antibody diluted as shown in Supplementary File  
220 1, **Table 2**. Immunodetection was performed using the Western Breeze Chemiluminescent  
221 Immunodetection System (Life Technologies) according to the manufacturer's instructions.  
222 Western blot images were captured on a Vilber Lourmat Fusion FX system using Fusion  
223 software and Bio- 1D software was used for image analysis.

224

225

### 226 *Live cell imaging*

227 U2OS cells, previously modified to tag the endogenous SFPQ gene with GFP were used for  
228 live-cell imaging (Li *et al.* 2017). Cells were seeded at  $1.5 \times 10^5$  cells per well in a 12-well  
229 plate, 24 hours before transfection, with high glucose DMEM (Life Technologies, Cat  
230 No.11995065) supplemented with 10% fetal calf serum and 1% penicillin-streptomycin. On  
231 the following day, cells in each well were transfected with 100 nM 2' O-methyl  
232 phosphorothioate AOs complexed with 2.2  $\mu$ l Lipofectamine 3000 following the  
233 manufacturer's instructions. Immediately after transfection, the plate was transferred to an  
234 Incucyte S3 (Essen Bioscience) for live-cell imaging at 1 hour intervals under 10 x optical  
235 zoom. SFPQ-GFP and activated caspase-3/7 were visualised under standard green and red  
236 channels. Incucyte Caspase-3/7 Red Apoptosis Assay Reagent (Essen Bioscience, Cat No.  
237 4704) was used to reveal cell apoptosis events.

238

239 *High resolution microscopy*

240 SIM imaging was performed using an N-SIM microscope (Nikon Corporation, Tokyo, Japan),  
241 with SR Apochromat TIRF 100 x 1.49 NA oil immersion objective. Spherical aberration was  
242 reduced using the Ti2 automated correction collar at the beginning of the imaging session.  
243 Images were acquired using 405 nm, 488 nm and 561 nm lasers, with stacks of step size 0.12  
244  $\mu\text{m}$  (with top and bottom of samples determined visually), using 3D-SIM mode. Images were  
245 reconstructed with NIS Elements software (Nikon Corporation, Tokyo, Japan).

246

247 *Transmission electron microscopy*

248 Following transfection, cells were washed in PBS and fixed in cold 2.5% phosphate buffered  
249 glutaraldehyde overnight. The fixed cells were scraped and centrifuged, then embedded in 4%  
250 agarose. The pellets were processed using a Leica tissue processor, moving through 1%  
251 aqueous osmium tetroxide, increasing graded alcohols, propylene oxide, propylene  
252 oxide/araldite mix, and finally pure araldite resin. The osmicated cells, surrounded by resin in  
253 a beam capsule were polymerised overnight at 80°C to form hard blocks.

254 Semi-thin (0.5 micron) sections were taken from the blocks using glass knives, on an RMC  
255 ultratome, and stained with methylene blue (0.1% aqueous Methylene Blue with 0.1%  
256 Borax) to visualise available cells. Ultrathin sections were then cut from selected blocks,  
257 using a Diatome diamond knife, at approximately 95 nm thickness and mounted on copper  
258 mesh grids and stained with uranyl acetate (5% uranyl acetate solution in 5% aqueous acetic  
259 acid) and Reynold's lead citrate. The grids were viewed using a JEOL 1400 TEM, at 80 kV  
260 and images captured by an 11-megapixel GATAN digital camera at varying magnifications.

261

262 *RNA sequencing and analysis*

263 RNA quality was confirmed using a Bioanalyser (Perkin Elmar, MA, USA) prior to  
264 RNAseq. Samples were sent to the Australian Genome Research Facility (AGRF, Perth and  
265 Melbourne, Australia) for whole transcriptome library preparation using the TruSeq Stranded  
266 Total RNA Library Prep Kit (Illumina, CA, USA) and ribosomal RNA depletion with the  
267 Ribo-Zero-Gold kit (Illumina, CA, USA). Sequencing was performed using an Illumina  
268 HiSeq 2500 (Illumina, CA, USA) to generate 100 base pair single end reads, resulting in an  
269 average 25 million reads per sample. Raw sequencing files were quality checked using  
270 FastQC (0.11.7), with all files passing. No adapter contamination was identified, and reads  
271 were not trimmed. Transcript quantification was performed with salmon (0.8.2), using an  
272 index constructed from the Ensembl GRCh38.93 annotation. Transcript abundance was



273 summarised to gene-level counts and imported into R using tximport (1.4.0). Differential  
274 expression analysis was performed using DESeq2 (1.16.1) and the default parameters ( $\alpha$   
275 = 0.1). The heatmap of differentially expressed genes ( $p_{\text{adj}} < 0.1$ ) was constructed using the  
276 heatmap.2 function from R package gplots (3.0.1). Gene ontology analysis was performed  
277 using GSEA (3.0) with 1000 gene set permutations. The gene ontology network was  
278 constructed using the Enrichment Map plugin for Cytoscape (3.5.1), with cut-offs:  $p < 0.05$ ,  
279 FDR < 0.1 and edge > 0.3.

280

## 281 **Results**

282

### 283 *Formation of nuclear inclusions after 2' O-methyl phosphorothioate AO transfection*

284 The phosphorothioate backbone can interact non-specifically with both intra- and extra-  
285 cellular proteins, and recruits paraspeckle proteins and forms paraspeckle-like structures  
286 when transfected into HeLa cells (Shen *et al.* 2014). However, the dynamics of the formation  
287 of these structures, as well as the long-term consequences of these structures on cell  
288 physiology remain unknown.

289

290 In this study, we largely focused on two 2' O-methyl phosphorothioate AOs, one that  
291 promotes *SMN2* exon 7 retention during splicing by targeting the *ISS-NI* intronic silencer  
292 motif (Singh *et al.* 2006) and the other a control oligomer sequence reported by Genetools  
293 LLC and widely used as a transfection control, although additional AO sequences were also  
294 tested in some experiments, as indicated below. In order to follow nuclear inclusion  
295 formation, we first transfected 2' O-methyl phosphorothioate AO as lipoplexes (100 nM)  
296 into U2OS cells expressing genome engineered GFP-labelled endogenous SFPQ (Li *et al.*  
297 2017) and performed live cell imaging over 48 hours (**Figure 1a**). The AO transfection  
298 induced formation of nuclear inclusions within 5 hours, and over a period of 12 hours, all of  
299 the SFPQ within the nucleus is observed sequestered within the inclusions, as revealed by  
300 decreased SFPQ staining of the nucleoplasm. Ultimately, only the inclusions are evident, at  
301 which time, the inclusions then coalesce into discrete filaments.

302

303 Immunofluorescent staining of the paraspeckle protein, NONO, showed colocalization in  
304 nuclear inclusions in fibroblasts transfected with 2' O-methyl phosphorothioate *SMN7D(-10-*  
305 *29)* sequence at 100 nM concentration, but were also evident at AO concentrations as low as  
306 12.5 nM within 24 hours of transfection (**Figure 1b**). Of note, the untreated cells show

307 diffuse nucleoplasmic NONO signal, as well as naturally occurring punctate NONO inside  
308 endogenous paraspeckle nuclear bodies (Fox *et al.* 2018) (eg. **Figure 1b** (ii)). Nuclear  
309 inclusions were also observed following 2' O-methyl phosphorothioate AO transfection into  
310 normal human myoblasts, transformed mouse *H2K* myoblasts, and the neuroblastoma SH-  
311 SY5Y cell line (Supplementary File 1, **Figure 1**). Once formed, the inclusions appear to be  
312 highly stable, and remain evident on the culture substrate following cell death and nuclear  
313 fragmentation and blebbing (**Figure 1c** (i-ii)). The nuclear inclusions appear as either long  
314 'filaments', punctate foci, or both (**Figure 1c** (iii)). In the past we have routinely observed  
315 marked cell death associated with transfection of 2' O-methyl phosphorothioate AOs into  
316 primary cells and cell lines, and hence explored any correlation between cell death and the  
317 formation of AO-induced nuclear inclusions. Indeed, we observed here that transfection with  
318 2' O-methyl phosphorothioate AO sequences induced nuclear inclusions that correlated with  
319 reduced cell survival (**Figure 1d-e**).

320  
321 While transfection of AOs with phosphorothioate and phosphodiester backbones have been  
322 demonstrated to result in nuclear inclusions (Shen *et al.* 2014), PMOs are yet to be evaluated  
323 in this context. We therefore transfected fibroblasts with the AO sequences described above,  
324 synthesized as PMOs. Transfection of the PMO sequences into fibroblasts did not alter the  
325 apparent distribution of NONO, nor of any other nuclear proteins studied (**Figure 1f**). In  
326 order to demonstrate that poor cellular uptake of these compounds was not a factor, PMOs  
327 were transfected using three established delivery techniques known to lead to altered target  
328 gene expression; uncomplexed PMO (10  $\mu$ M), nucleofection (1  $\mu$ M), and annealed to a  
329 complementary DNA "leash" and transfected as a lipoplex (200 nM), all incubated for 72  
330 hours after transfection (**Figure 1f** (i-iii), respectively). Immunofluorescent detection of  
331 NONO showed no PMO-induced intranuclear inclusion formation or altered distribution of  
332 NONO following transfection, under any of the conditions used, and was reproducible,  
333 irrespective of the PMO sequence. Transfection efficiency and altered exon selection in the  
334 target *SMN2* transcript was assessed by RT-PCR across *SMN* exons 4-8, confirming that the  
335 absence of intranuclear inclusions in PMO transfected cells was not a consequence of poor  
336 uptake of PMO (**Figure 1g**).

337  
338  
339  
340

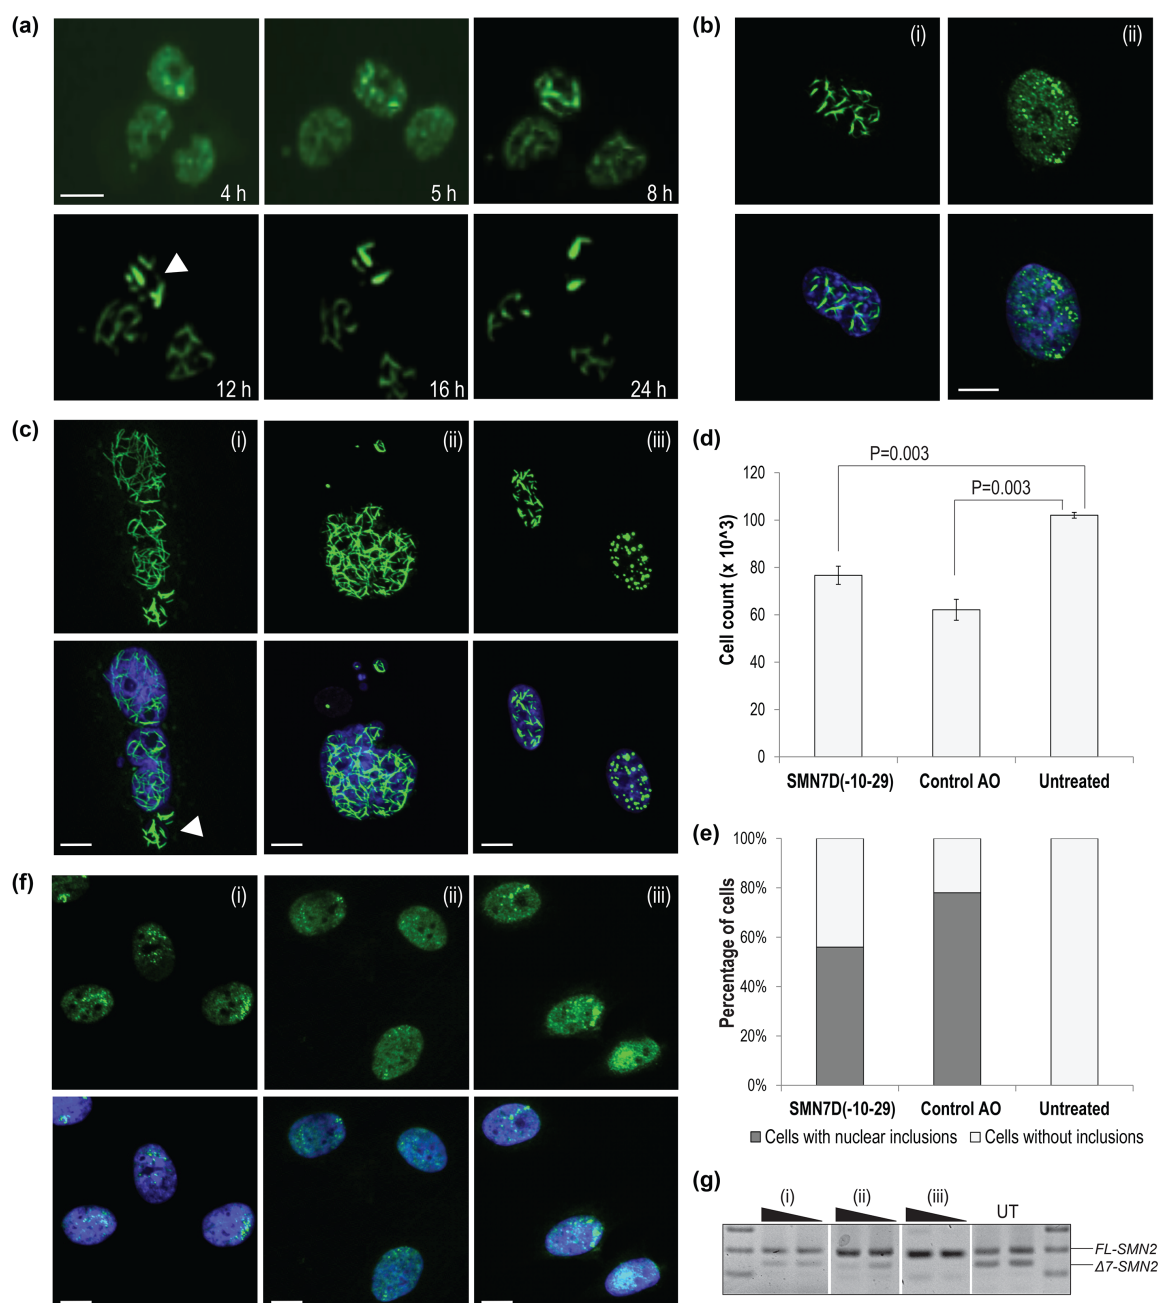

341

342

343 **Figure 1 – Formation of nuclear inclusions.** Showing (a) live cell imaging time-course of U2OS cells with  
 344 endogenous SFPQ-GFP showing the formation of nuclear inclusions over 24 hours following 2' O-methyl  
 345 phosphorothioate control AO transfection (100 nM), inclusions are indicated by the white arrow; (b) fibroblasts  
 346 transfected with 12.5 nM of 2' O-methyl phosphorothioate *SMN7D(-10-29)* stained for NONO (i), compared to  
 347 untreated fibroblasts (ii); (c) fibroblasts stained for NONO show, (i) nuclear inclusions without evidence of nuclear  
 348 staining after 2' O-methyl phosphorothioate *SMN7D(-10-29)* transfection, (ii) nuclear blebbing after 2' O-methyl  
 349 phosphorothioate control AO transfection and (iii) nuclear inclusions in the form of filaments or foci induced by  
 350 transfection with a 2' O-methyl phosphorothioate *SMN7D(-10-29)* sense sequence AO; (d) graph showing the  
 351 number of viable fibroblasts following 2' O-methyl phosphorothioate AO transfection (n=4), error bars represent  
 352 standard error of the mean and P-values were calculated using an unpaired T-test; (e) graph showing the  
 353 percentage of fibroblasts containing nuclear inclusions following 2' O-methyl phosphorothioate transfection with a  
 354 minimum of 200 cells counted per sample; (f) fibroblasts stained for NONO after transfection with PMO *SMN7D(-)*

355 10-29) at (i) high dose un-complexed (10  $\mu$ M), (ii) using a complementary leash and transfection reagent (200  
356 nM) and (iii) using electroporation (1  $\mu$ M), all incubated for 72 hours; and (g) RT-PCR of full length (FL) and exon  
357 7 skipped ( $\Delta$ 7) *SMN2* transcripts of RNA collected following transfections as in (f). All scale bars = 10  $\mu$ m.  
358

359 To further explore whether AO-induced nuclear inclusions are sequence independent, ninety  
360 2' O-methyl phosphorothioate AOs targeting structural gene transcripts, transcription factors,  
361 splicing factors and enzymes, were transfected into fibroblasts and the cells were  
362 immunostained for SFPQ (Supplementary File 1, **Table 3**). All AOs tested disrupted SFPQ  
363 distribution and all but one AO formed nuclear inclusions by 24 hours following AO  
364 transfection at 100 nM, irrespective of length (18-30 bases) and nucleotide composition  
365 (Supplementary File 1, **Table 3**), indicating that with optimal transfection efficiency, any 2'  
366 O-methyl phosphorothioate sequence is likely to induce nuclear inclusions. One transfected  
367 AO induced NONO localization to the nuclear envelope (Supplementary File 1, **Figure 2a**),  
368 while a number of AO sequences induced cytoplasmic SFPQ aggregates in addition to  
369 nuclear inclusions (Supplementary File 1, **Figure 2b**). The AO-mediated cytoplasmic  
370 aggregate formation was also reported by Liang *et al.*, 2014, who observed cytoplasmic  
371 structures as a consequence of TCP1-beta subunit interaction with phosphorothioate-AOs in  
372 the cytoplasm, in addition to formation of nuclear 'phosphorothioate bodies', and concluded  
373 that upon transfection, the TCP1 proteins interact with phosphorothioate AOs and enhance  
374 antisense activity (in this case, activation of the RNase H-mediated target degradation)  
375 (Liang *et al.* 2015).

376  
377 *Composition of nuclear inclusions induced by 2' O-methyl phosphorothioate AO transfection*

378 The structure and composition of nuclear inclusions was further investigated by  
379 immunostaining of additional selected nuclear proteins found in paraspeckles, the nuclear  
380 envelope, nucleoli, nuclear speckles, Cajal bodies and nuclear stress bodies. The paraspeckle  
381 proteins PSPC1 and FUS were evident in nuclear inclusions (Supplementary File 1, **Figure**  
382 **3a and 3b**) while the proteins TDP-43 and hnRNP-A1 were not observed to be components  
383 of nuclear inclusions (Supplementary File 1, **Figure 3c and 3d**).

384  
385 Coilin, a component of nuclear Cajal bodies, shows altered distribution in 2' O-methyl  
386 phosphorothioate control AO transfected cells and is distributed evenly through the  
387 nucleoplasm and cytoplasm of transfected cells showing NONO-positive nuclear inclusions,  
388

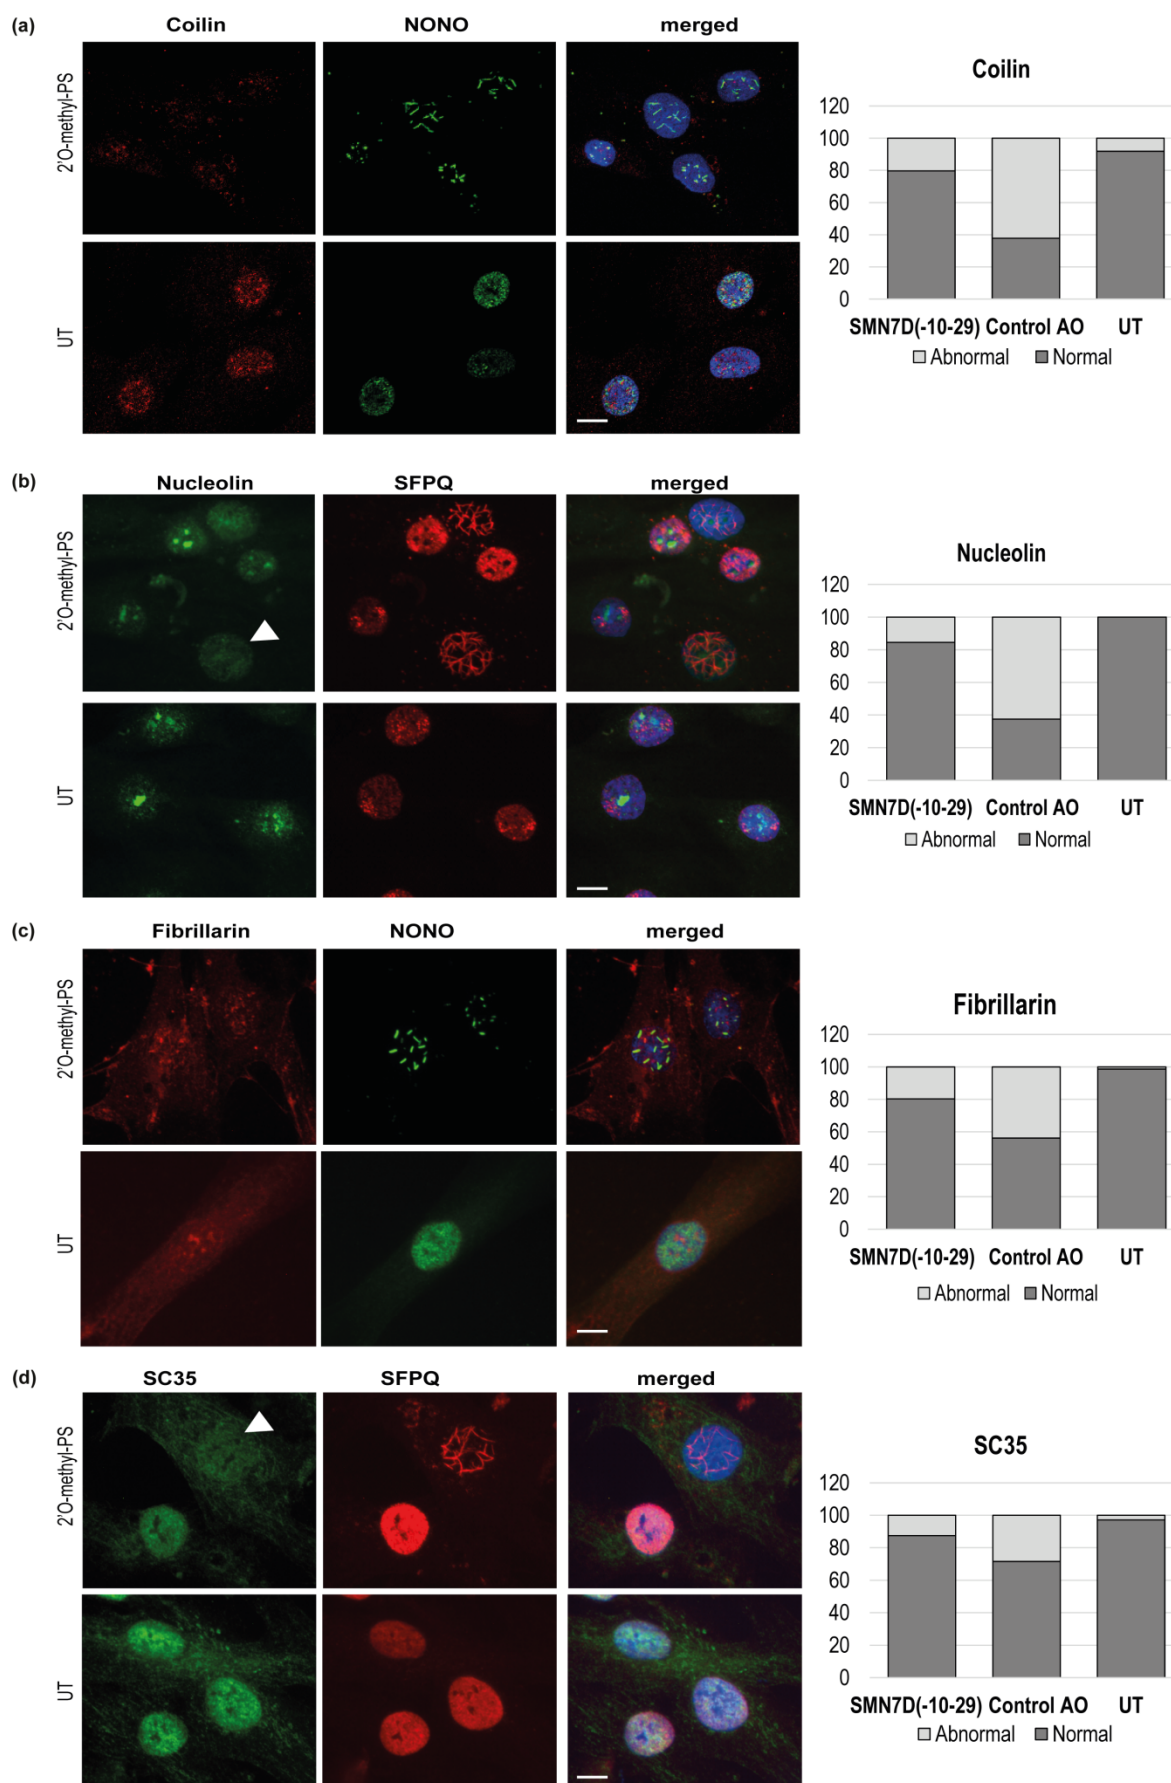

390 **Figure 2 – Staining of nuclear bodies following 2' O-methyl phosphorothioate transfection (100 nM, 24**  
391 **hours), with AOs as indicated in fibroblasts. (a)** transfected with the control AO showing coilin (red) and  
392 NONO (green) overlaid with hoechst (blue), and graph showing the percentage of abnormal and normally  
393 stained cells in cultures transfected with *SMN7D(-10-29)* and control AOs; **(b)** transfected with *SMN7D(-10-29)*  
394 showing nucleolin (green) and SFPQ (red) overlaid with hoechst (blue), and graph showing the percentage of  
395 abnormal and normally stained cells in cultures transfected with *SMN7D(-10-29)* and control AOs; **(c)** transfected  
396 with the control AO showing fibrillarin (red) and NONO (green) overlaid with hoechst (blue), and graph showing  
397 the percentage of abnormal and normally stained cells in cultures transfected with with *SMN7D(-10-29)* and  
398 control AOs and **(d)** transfected with *SMN7D(-10-29)* showing SC35 (green) and SFPQ (red) overlaid with  
399 hoechst (blue), and graph showing the percentage of abnormal and normally stained cell in cultures transfected  
400 with *SMN7D(-10-29)* and control AOs. A minimum of 100 cells were counted for each sample. All scale bars = 10  
401  $\mu\text{m}$ .

402  
403 whereas it is present almost exclusively in the nucleus of untreated cells (**Figure 2a**).  
404 Nucleolin and fibrillarin, both markers for the nucleolus, show altered distribution in nuclear  
405 inclusion-containing cells, changing from nucleolar to diffuse nucleoplasmic, as shown in  
406 **Figures 2b** and **2c**, respectively. The splicing factor and component of nuclear speckles,  
407 SC35, showed enhanced cytoplasmic localisation in cells that also contained nuclear  
408 inclusions, revealed here by SFPQ immunofluorescence (**Figure 2d**).

409  
410 The percentage of AO transfected cells showing disrupted staining or abnormal localization  
411 of coilin, nucleolin, fibrillarin and SC35 staining correlated with cells containing  
412 intranuclear inclusions, as indicated in the graphs (**Figure 2a-d**). Line intensity profiling  
413 shows altered distribution of these nuclear proteins in individual cells that have nuclear  
414 inclusions, and is presented in Supplementary File 1, **Figure 4**. Since components of  
415 subnuclear organelles were disorganised following transfection with phosphorothioate AOs,  
416 the levels of these proteins in the transfected cells were investigated. Western blot analysis  
417 showed that the overall abundance of each protein studied to be essentially unchanged  
418 following AO transfection. Representative western blots probed for SFPQ, NONO, TDP43,  
419 hnRNP-A1, NCL, HSF1 and beta actin, are shown in Supplementary File 1, **Figure 5**.

#### 421 *Morphology of 2' O-methyl phosphorothioate AO-induced nuclear inclusions*

422 Detailed analysis of the 2' O-methyl phosphorothioate *SMN7D(-10-29)*AO-induced nuclear  
423 inclusions was performed using transmission electron microscopy (TEM) on ultra-thin,  
424 osmium stained sections (**Figure 3a(i-vi)**). The nuclear inclusions appeared to be  
425 microfibrillar or amyloid-like, approximately 200-250 nm in diameter, occurring mostly in  
426 groups or bundles. For reference, the width of a DNA double helix is  $\sim 2$  nm. If captured in a

427 suitable plane of section, the structures appear to have very electron dense termini. Such  
428 nuclear inclusions have never before been revealed by transmission electron microscopy in  
429 the investigating laboratory. The electron dense regions are reminiscent of perichromatin in  
430 size and electron density, the inclusions revealed by TEM extend to ~ 2000 nm in length.  
431 Numerous small, partially formed inclusions are also evident in nuclei of transfected cells  
432 when viewed at higher magnification (**Figure 3a (iii)**).

433  
434 Since transmission electron microscopy can only capture segments of the presumed large  
435 fibril-like nuclear inclusions, super resolution microscopy was used to examine 2' O-methyl  
436 phosphorothioate *SMN7D(-10-29)* AO transfected and untreated fibroblasts (**Figure 3b-c**).  
437 AO transfected fibroblasts co-stained for NONO and SFPQ show a network of many nuclear  
438 inclusions characterised by co-localisation of the two proteins, whereas the untreated cells  
439 show more even, punctate distribution within paraspeckles (**Figure 3b (i, ii)**), respectively).  
440 Transfected fibroblasts co-stained for SFPQ and FUS reveal large interconnected fibril-like  
441 structures decorated with FUS at mid-points and at the termini (**Figure 3c (i)**). SFPQ, NONO  
442 and FUS are all sequestered to the nuclear inclusions, unlike the even nuclear distribution of  
443 these proteins in untreated cells (**Figure 3c (ii)**).

444  
445 The nuclear envelope protein, lamin B1 showed altered distribution in a proportion of 2' O-  
446 methyl phosphorothioate *SMN7D(-10-29)* transfected cells that exhibited nuclear inclusions  
447 (**Figure 3d (i-ii)**). In these cells, the nuclear envelope labelled by immunostaining of lamin  
448 B1 appears multi lobular and distorted, reminiscent of those found in the premature ageing  
449 disease progeria and in E145K cells (Taimen *et al.* 2009). A single z-frame image is shown  
450 in **Figure 3d (i)** that clearly illustrates lamin B1 localized in 4 distinct nuclear lobules.  
451 **Figure 3d (ii and iii)** shows the composite image and an image of an immunostained,  
452 untreated fibroblast. In all images (**Figure 3b-d**), the nuclear inclusions appear to reside  
453 between areas that may reflect chromosomal territories.

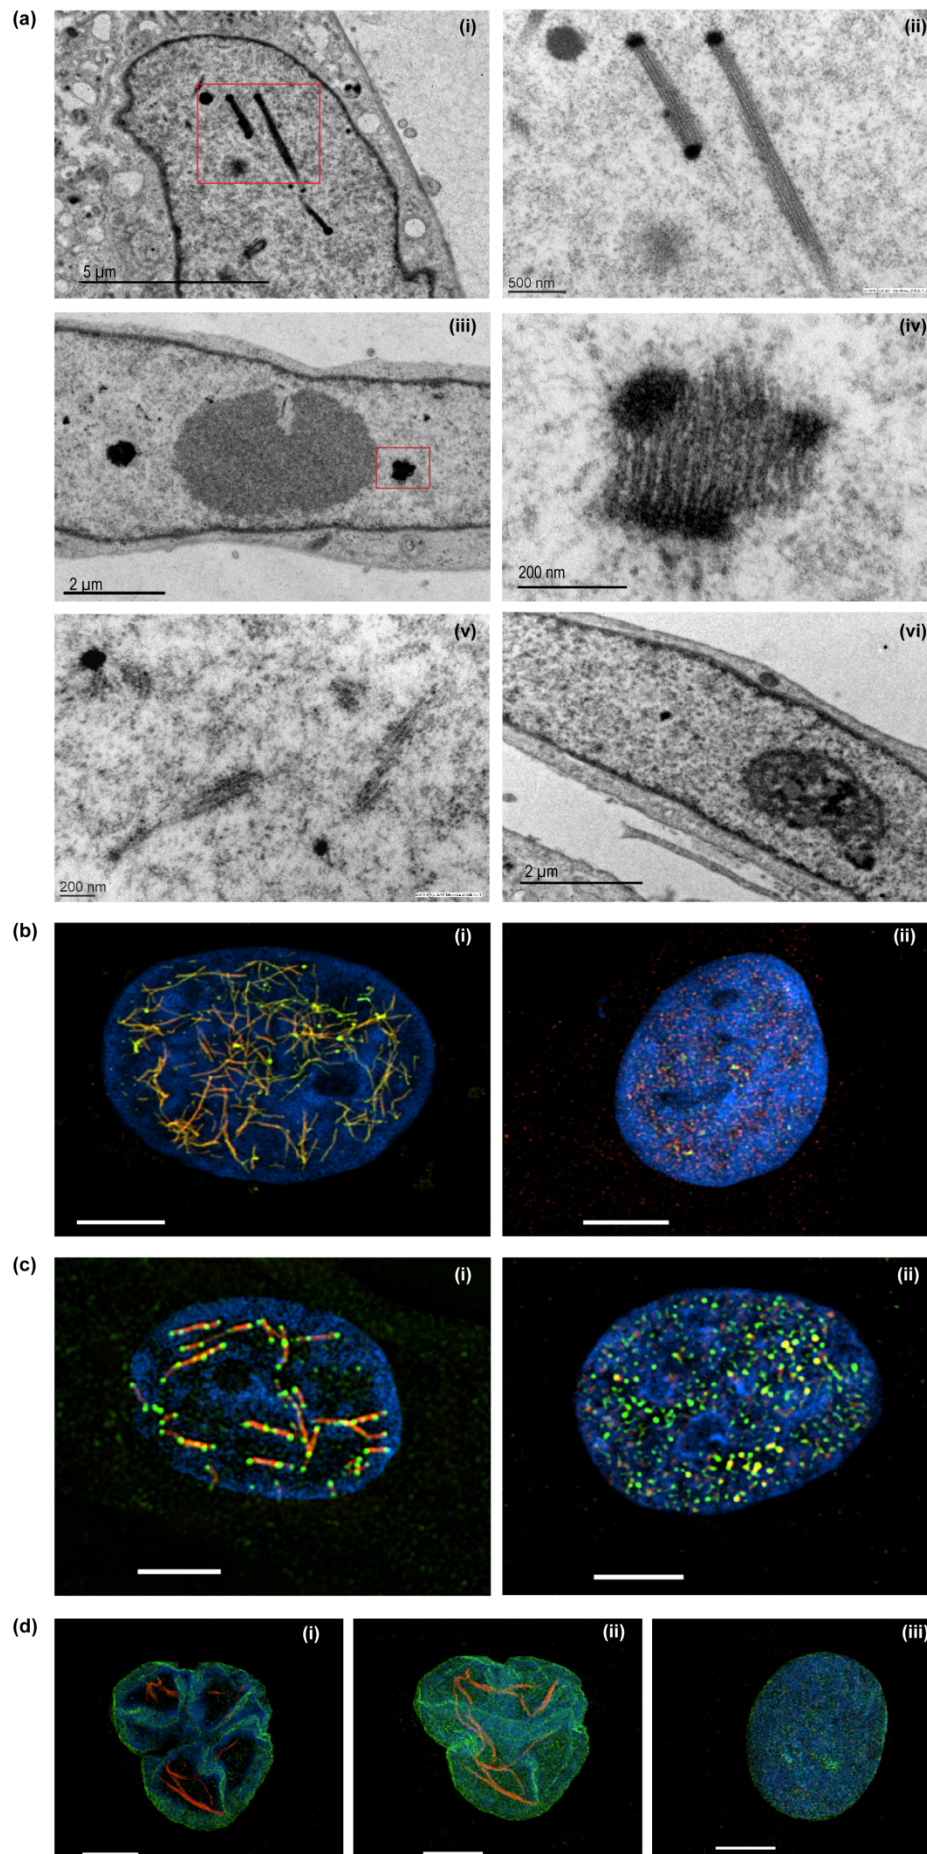



455 **Figure 3 – Structural analysis of nuclear inclusions in 2' O-methyl phosphorothioate transfected**  
456 **fibroblasts.** Fibroblasts were transfected with the 2' O-methyl phosphorothioate AO, *SMN7D(-10-29)* at 100 nM,  
457 for 24 hours). Transfected and untreated control cells were processed for transmission electron microscopy (**a**)  
458 and super resolution fluorescence microscopy (**b-d**). Showing (**a**) transmission electron microscopy of (i) nucleus  
459 with filament-like nuclear inclusions (scale = 5  $\mu$ m), (ii) higher magnification of (i) (scale = 500 nm), (iii) nucleus  
460 with foci-like nuclear inclusions (scale = 2  $\mu$ m), (iv) higher magnification of (iv) (scale = 200 nm), (v) partially  
461 formed nuclear inclusions (scale = 200 nm), and (vi) untreated nucleus (scale = 2  $\mu$ m); (**b**) super resolution  
462 fluorescence microscopy of SFPQ (green) and NONO (red) co-staining following 2' O-methyl phosphorothioate  
463 (*SMN7D(-10-29)*) transfection (i) and an untreated cell (ii); (**c**) super resolution fluorescence microscopy of SFPQ  
464 (red) and FUS (green) co-staining following transfection (i) and an untreated cell (ii); (**d**) super resolution  
465 fluorescence microscopy of NONO (red) and LAMIN-B1 (green) co-staining following transfection (i-ii) and an  
466 untreated cell (iii). A single z-frame is shown in (i) and a maximum intensity z-stack in (ii). For all SIM images  
467 scale bar = 5  $\mu$ m.  
468

#### 469 *2' O-methyl phosphorothioate AOs affect ribosomal RNA processing and maturation*

470 Since Cajal bodies and fibrillarin are important in ribosomal RNA processing and assembly,  
471 we assessed rRNA levels in 2' O-methyl phosphorothioate AO transfected cells and  
472 untreated cells. qPCR and bioanalyser data show unprocessed rRNA was markedly increased  
473 by 2' O-methyl phosphorothioate AO transfection in fibroblasts (**Figure 4**). A Bioanalyser  
474 RNA trace from 2' O-methyl phosphorothioate control AO transfected fibroblasts (**Figure**  
475 **4a**) showed low levels of 18S and 28S ribosomal subunits, as well as a number of  
476 intermediate peaks compared to that on RNA from untreated fibroblasts (**Figure 4b**),  
477 consistent with incomplete rRNA processing. Poor RNA quality was ruled out, given a  
478 similar pattern was observed in all experimental repeats (n=6). This observation was  
479 supported by qPCR analysis of rRNA levels showing a 2 to 3.5-fold increase in the level of  
480 the unprocessed 45S rRNA in 2' O-methyl phosphorothioate transfected compared to  
481 untreated fibroblasts (**Figure 4c**). Unprocessed rRNA accumulated over time, following the  
482 formation of nuclear inclusions (**Figure 4d**).

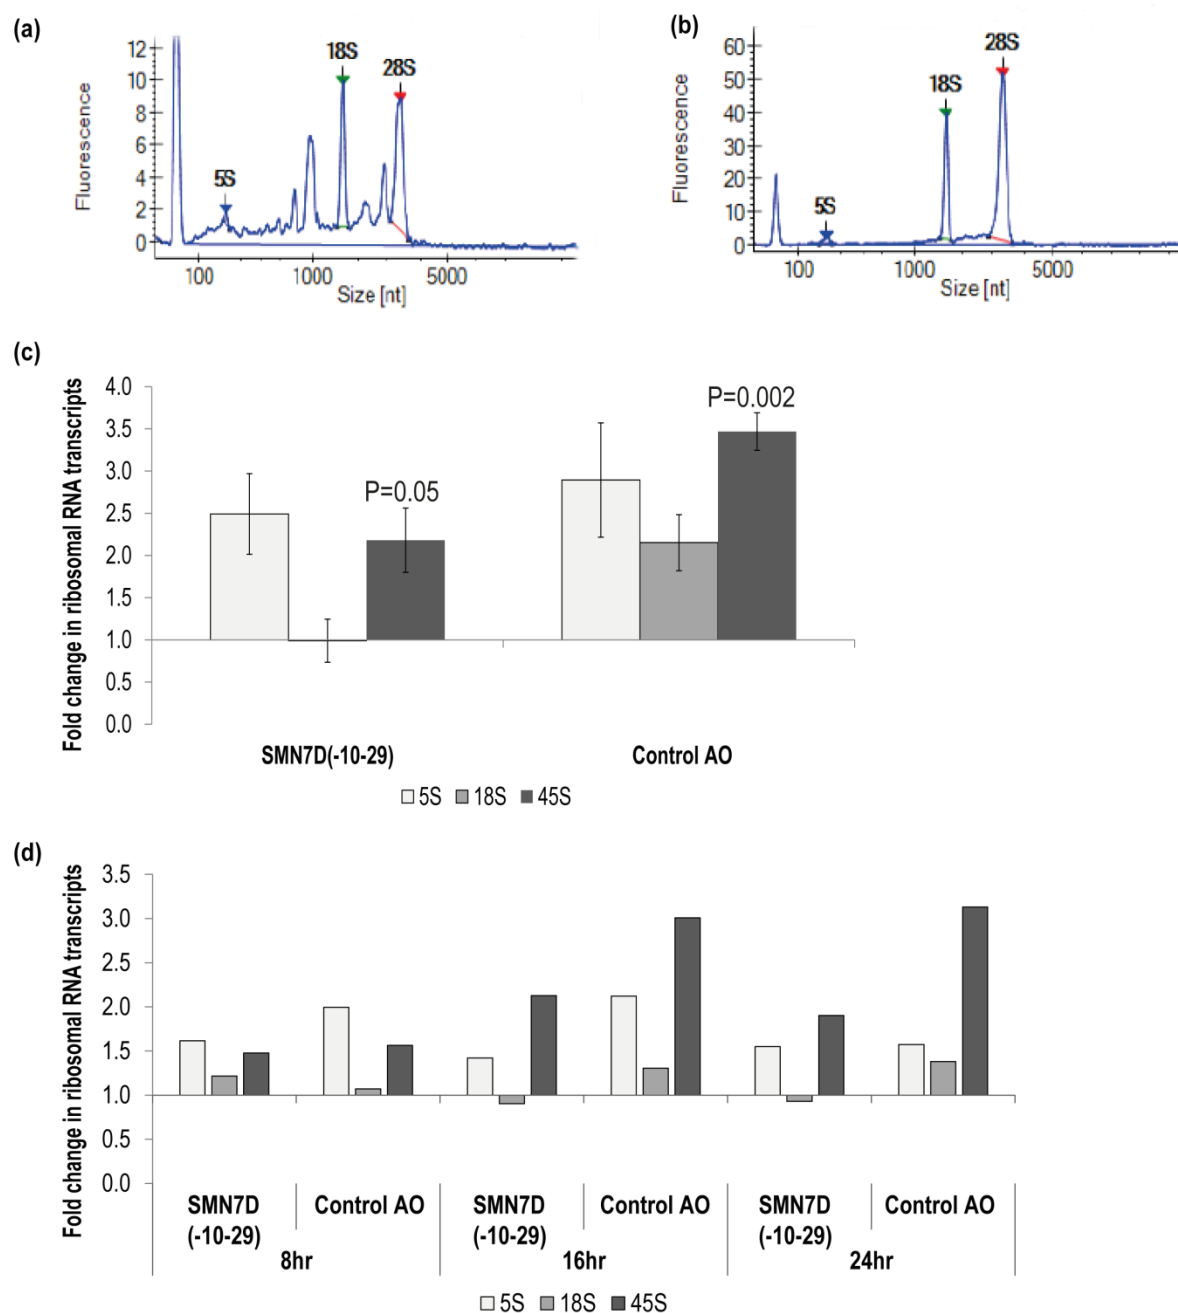

483

484 **Figure 4 – Analysis of ribosomal RNA processing.** Showing bioanalyser trace of rRNA from (a) 2' O-methyl  
 485 phosphorothioate control AO transfected cells, and (b) untreated cells; (c) qPCR analysis of 5S, 18S and 45S  
 486 rRNA levels following 2' O-methyl phosphorothioate transfection (24 hours). rRNA levels were normalised against  
 487 *TBP* and compared to those in untreated cells where untreated = 1 (n=3). Error bars represent the standard error  
 488 of the mean, and P-values were calculated comparing each AO treatment group to the untreated group using an  
 489 unpaired T-test; and (d) qPCR analysis of rRNA levels over 8, 16 and 24 hours; analysis as in (c) (n=1).  
 490

491 *2' O-methyl phosphorothioate AO transfection promotes apoptosis*

492 Following phosphorothioate AO transfection of U2OS cells at 100 nM, live cell imaging was  
 493 undertaken to evaluate caspase activation (**Figure 5a**). Nuclear inclusions were observed

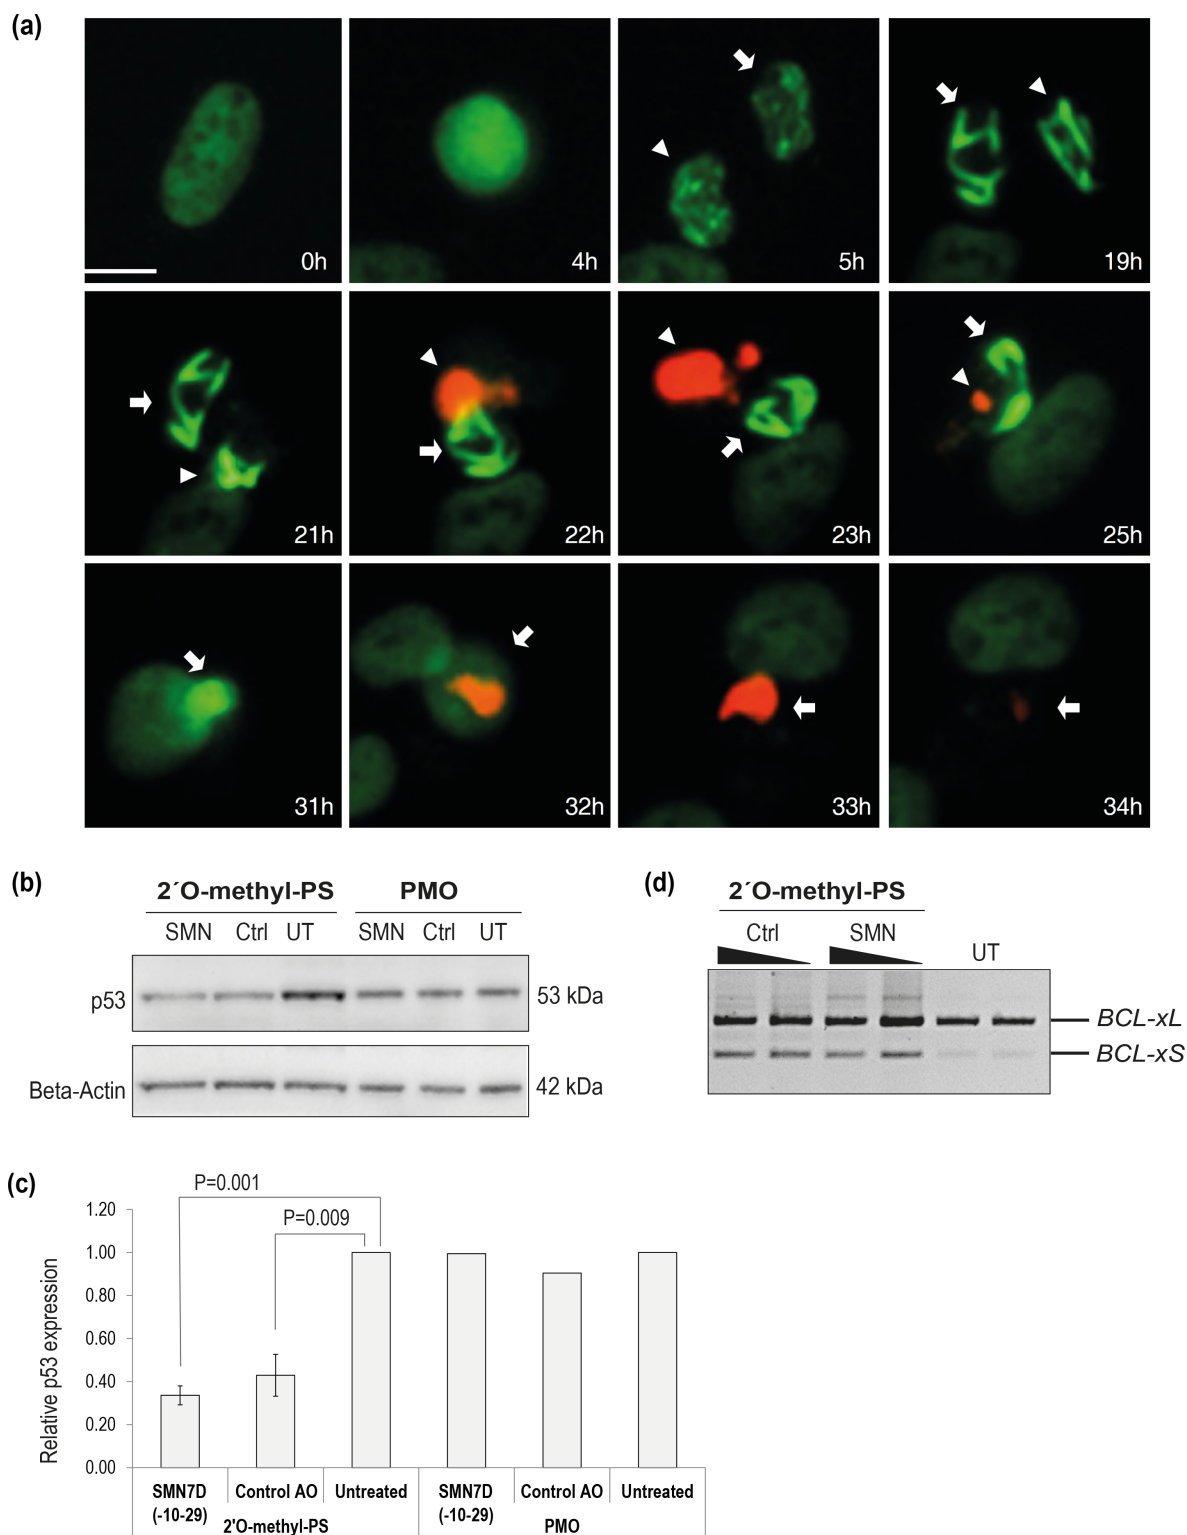

494

495 **Figure 5 – Analysis of cellular toxicity following 2' O-methyl phosphorothioate AO transfection.** (a) live  
 496 cell imaging over time of U2OS cells with endogenous SFPQ-GFP (green) transfected with the 2' O-methyl  
 497 phosphorothioate control AO and stained for caspase 3/7 activation (red). Two sister cells are annotated with  
 498 arrows, and scale bar = 10 μm; (b) western blot of P53 and β-actin levels in fibroblasts following 2' O-methyl  
 499 phosphorothioate AO (n=3) and PMO transfection (n=1); (c) densitometry analysis of (b) where P53 levels are  
 500 normalized to β-actin and compared to those in untreated cells where untreated = 1. Error bars represent the  
 501 standard error of the mean and P-values were calculated using an unpaired T-test; and (d) RT-PCR analysis of

502 *BCL2* transcripts in fibroblasts following 2' O-methyl phosphorothioate AO transfection, as indicated at 100 and 50  
503 nM (24 hours).

504

505 after 5 hours in two sister cells. Nuclear inclusions became larger and more compact  
506 overtime, followed by caspase activation after 22 hours. No caspase activation was observed  
507 in the absence of intranuclear inclusions, identifying nuclear inclusion as complicit in  
508 caspase activated apoptosis, leading to cell death. The tumour suppressor protein p53 was  
509 decreased, following transfection with 2' O-methyl phosphorothioate AOs, relative to  
510 untreated control cells (**Figure 5b and c**), suggesting that the cell death observed was p53  
511 independent, contrary to the findings by Shen *et al.*, 2018 (Shen *et al.* 2018) when using a 2'  
512 fluoro-modified AO on a phosphorothioate backbone in the mouse. In comparison to  
513 phosphorothioate AO transfection, p53 levels remained unchanged following PMO  
514 transfection (**Figure 5b and c**).

515

516 The mitochondrial membrane and apoptosis regulating, *BCL2*-like gene encodes two  
517 alternatively spliced, functional protein isoforms, a longer anti-apoptotic isoform BCL-xL,  
518 and a shorter pro-apoptotic isoform BCL-xS. Increased abundance of the BCL-xS isoform  
519 induces cytochrome C release from the mitochondria, initiating caspase activated apoptosis.  
520 RT-PCR across the *BCL* transcripts (**Figure 5d**) shows 2' O-methyl phosphorothioate AO  
521 transfection induces non-specific alternative splicing, increasing the levels of the pro-  
522 apoptotic *BCL-xS* transcript, potentially initiating the caspase activation shown in **Figure 5a**.

523

524 *Transcriptome analysis of 2' O-methyl phosphorothioate transfected cells reveals global*  
525 *cellular disruptions*

526 We next evaluated the effect of 2' O-methyl phosphorothioate transfection and nuclear  
527 inclusion formation on the transcriptome by RNA-seq. We prepared RNA from fibroblasts  
528 transfected with the two 2' O-methyl phosphorothioate AOs used throughout this study as  
529 well as two control samples (untreated cells and cells transfected with a DNA phosphodiester  
530 AO (DNA control) version of the same sequence as the control AO, 100 nM for 24 hours) for  
531 RNAseq analysis (n=3). The RNAseq data is available

532 at <https://www.ncbi.nlm.nih.gov/geo/query/acc.cgi?acc=GSE121713> (accession number:

533 GSE121713). An RNAseq heatmap comparing the expression of transcripts in 2' O-methyl

534 phosphorothioate AO transfected fibroblasts to that in cells transfected with the DNA

535 phosphodiester oligonucleotide and untreated cells showed stark differences in expression

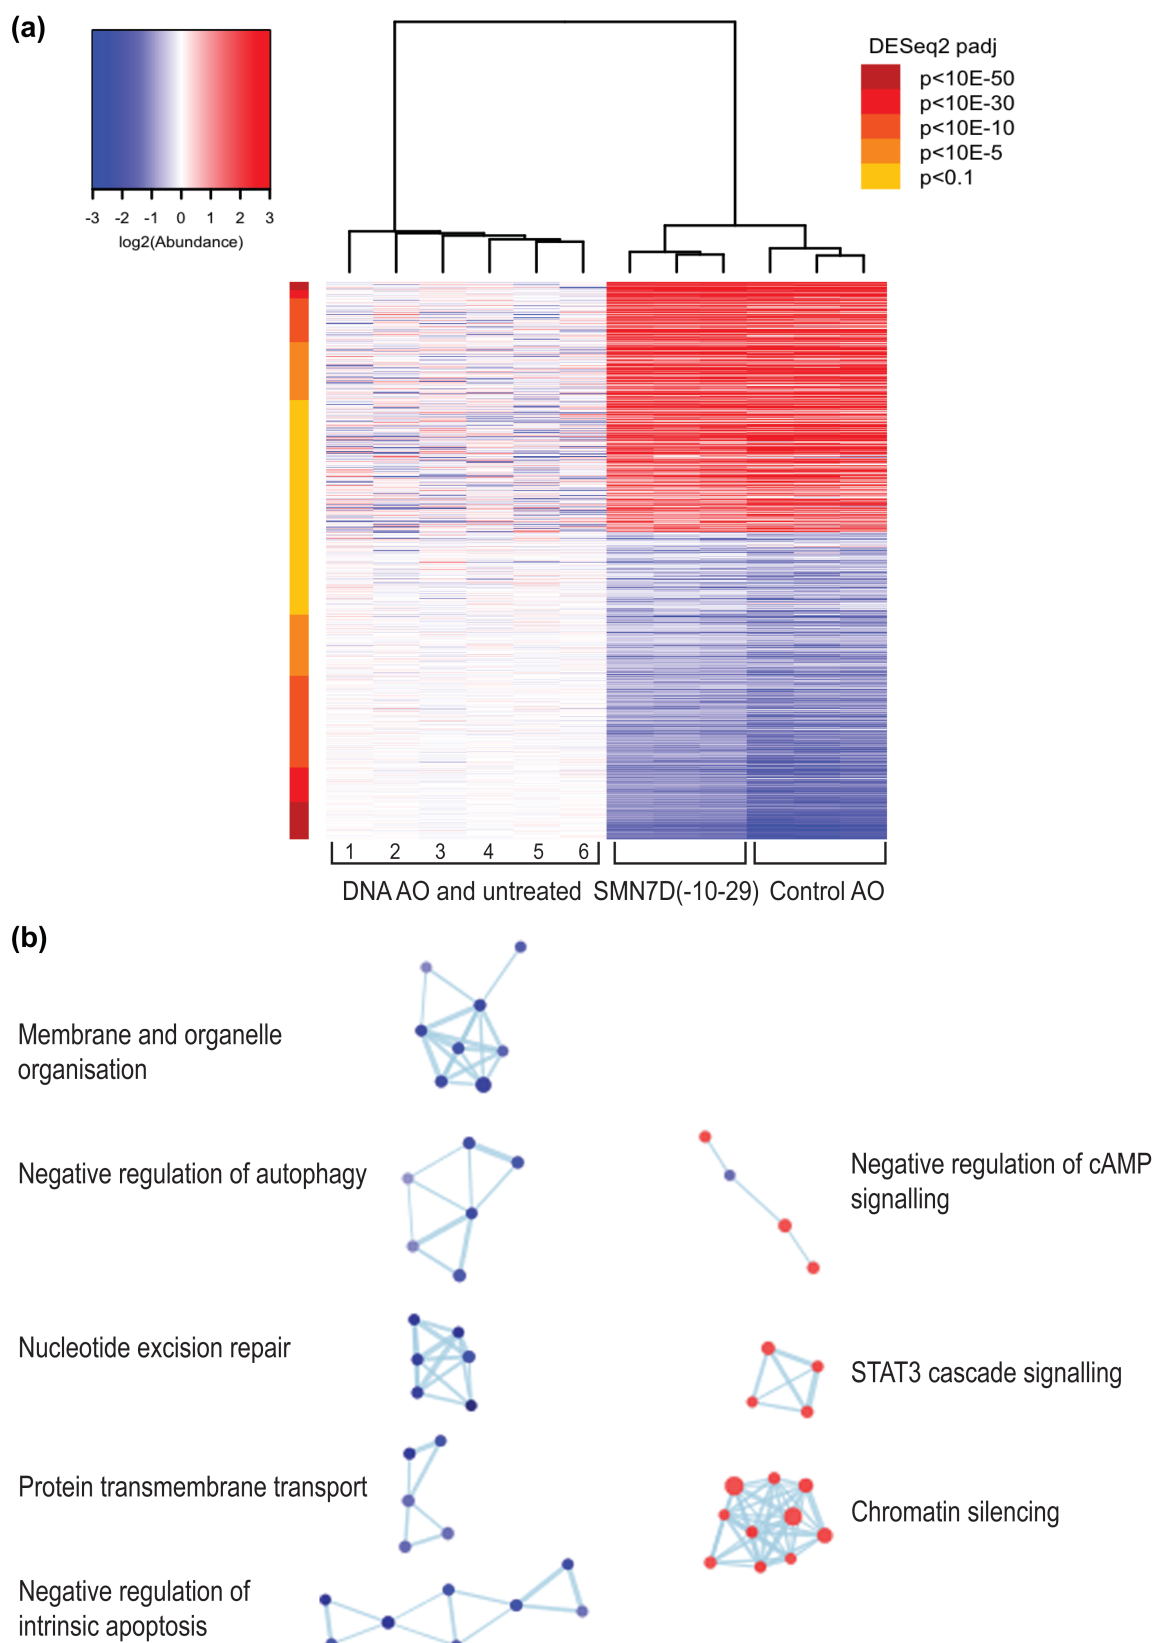

536

537

538 **Figure 6 – RNA sequencing analysis of 2' O-methyl phosphorothioate AO transfected fibroblasts. (a)**  
 539 heatmap of all differentially expressed transcripts in control (1, 4, 5-untreated and 2, 3, 6, DNA AO) and 2' O-  
 540 methyl phosphorothioate AO *SMN7D(-10-29)* and control AO) transfected (100 nM, 24 hours) cells, whereby red

541 represents overexpressed transcripts, and blue represents under-expressed transcripts; and **(b)** gene ontology  
542 (GO) network of significantly affected cellular pathways in samples from transfected, compared to untreated and  
543 DNA AO transfected cells. GO terms are represented as dots being either overexpressed (red) or under-  
544 expressed (blue), and groups with greater than 50% of genes in common are linked.

545

546 between the groups (**Figure 6a**). Transcripts that are overexpressed in 2' O-methyl  
547 phosphorothioate AO transfected cells compared to controls are indicated in red, while those  
548 that are underexpressed are indicated in blue.

549

550 Gene ontology (GO) analyses showed significant disruptions in transcripts involved in a  
551 number of major cellular pathways. The GO network (**Figure 6b**) revealed cellular processes  
552 and pathways that are significantly over-expressed include signaling pathways, chromatin  
553 silencing, and metabolic pathways, while those that are significantly under-expressed  
554 include negative regulation of apoptosis and autophagy, membrane and organelle  
555 organisation, protein transmembrane transport and nucleotide excision repair. Gene ontology  
556 pathways included in each cellular process are listed in **Supplementary File 2**. Thus, overall  
557 these data show dramatic and widespread changes to gene expression in human fibroblasts  
558 as a result of the uptake of the 2' O-methyl phosphorothioate AOs.

559

## 560 **Discussion**

561 AOs have therapeutic potential as modulators of gene expression in many different diseases,  
562 and can do so through several different mechanisms. Antisense drugs that are in current  
563 clinical use alter exon selection during pre-mRNA processing, or induce RNaseH degradation  
564 of the target mRNA, the mechanism of action determined by the nature of the AO chemistry  
565 (for review see (Tri Le *et al.* 2016)). However, emerging reports of off-target effects  
566 conferred by synthetic oligonucleotides, identified *in vitro* (Shen *et al.* 2014, Shen *et al.* 2015)  
567 and *in vivo* (Shen *et al.* 2014, Shen *et al.* 2018), demand careful examination of the molecular  
568 effects of these compounds. Here we report that transfection of cultured human dermal  
569 fibroblasts, U2OS osteosarcoma cells, SH-SY5Y neuroblastoma cells and primary myogenic  
570 cells with 2' O-methyl phosphorothioate oligonucleotides causes the formation of large  
571 structured nuclear inclusions, decorated with proteins that are normally components of  
572 nuclear organelles, in particular, paraspeckles. We show evidence that 2' O-methyl  
573 phosphorothioate AO transfection alters the distribution of proteins normally associated with  
574 subnuclear bodies, impacts on global transcript expression and ribosomal RNA processing,

575 among other critical cellular processes, and induces cell stress, followed by apoptosis.

576

577 Interaction of phosphorothioate oligonucleotides with nuclear proteins, including certain  
578 paraspeckle proteins, and the formation of paraspeckle-like structures, independent of  
579 *NEAT1*, has been reported (Shen *et al.* 2014, Shen *et al.* 2015, Shen *et al.* 2018). While Shen  
580 *et al.* (Shen *et al.* 2014) focused on the effect of phosphorothioate AOs on NONO and  
581 reported altered paraspeckle structure, this was in the context of AO-mediated modulation of  
582 gene expression, not the broader cell biology. Other off-target effects and non-specific  
583 binding of proteins, initiated by the negatively charged phosphorothioate backbone have  
584 been reported elsewhere (Dias and Stein 2002, Winkler *et al.* 2010, Liang *et al.* 2015).

585 Hence, our experience and extensive research usage of AOs prompted further investigation of  
586 the global consequences of 2' O-methyl phosphorothioate AO transfection on cell biology,  
587 showing many significant changes, as described above. In contrast, the transfection of  
588 (charge-neutral) PMOs in the current study did not disrupt subnuclear structures, or result in  
589 any alteration in the distribution or staining intensity of the nuclear proteins studied. This  
590 result was reproducible using multiple delivery techniques, including high dose, uncomplexed  
591 PMO transfection, transfection of PMO annealed to a DNA leash and complexed with  
592 liposome reagent, as well as nucleofection. In comparison, all 2' O-methyl phosphorothioate  
593 AO sequences tested induced novel, structured intranuclear inclusions, revealed by  
594 transmission electron microscopy to have amyloid aggregate-like appearance.

595

596 The nuclear inclusions observed in phosphorothioate transfected cells are associated with  
597 altered nuclear architecture, disturbed gene expression and ultimately, apoptosis. While  
598 formation of such large, and apparently irreversible structures would be expected to impact on  
599 nuclear biology, the likely consequences of aberrant sequestration of paraspeckle and other  
600 nuclear proteins on RNA processing and post transcriptional regulation are of prime concern.  
601 Paraspeckles are dynamic, RNA-protein nuclear organelles that occur in the interchromatin  
602 space in mammalian cells and are now known to contain over 40 different proteins associated  
603 with one architectural long non-coding RNA, *NEAT1\_2* (for review see (Fox *et al.* 2018)).  
604 Observed in most cultured cells-other than various stem cells, and cells experiencing stress,  
605 paraspeckles regulate gene expression through sequestration of proteins and RNAs (Fox *et al.*  
606 2018), but are also implicated in microRNA biogenesis (Jiang *et al.* 2017). Paraspeckle  
607 proteins can undergo rapid, but normally reversible aggregation from monomers to form

608 amyloid-like structures, seeded by *NEATI\_2*, and likely mediated through prion-like domains  
609 that are enriched in uncharged polar amino acids (Lancaster *et al.* 2014). The mechanism by  
610 which phosphorothioate oligonucleotides induce some paraspeckle proteins to form aberrant  
611 aggregates is unknown, however, we do know that sub cellular localization and  
612 phosphorothioate AO behaviour in transfected cells is influenced by protein interactions and  
613 the 2' sugar AO modifications (Bailey *et al.* 2017, Crooke *et al.* 2017), and that synthetic  
614 double stranded RNA is also able to seed *de novo* paraspeckle formation (Shelkovnikova *et*  
615 *al.* 2018). How other nuclear proteins become incorporated into the phosphorothioate AO  
616 induced nuclear inclusions, and why TDP43, a major component of paraspeckles does not  
617 appear in these inclusions in our study, remains elusive.

618  
619 Immunofluorescent staining of 2' O-methyl phosphorothioate transfected fibroblasts revealed  
620 the paraspeckle components NONO, PSPC1, SFPQ and FUS co-localised with large nuclear  
621 structures in excess of 2000 nm in length, with FUS decorating the structures in an ordered  
622 manner. All four of these proteins include prion-like domains (for review see (Fox *et al.*  
623 2018)) and we speculate that the known propensity of phosphorothioate backbone compounds  
624 to interact with and bind proteins then alters the liquid-liquid phase properties of the  
625 paraspeckle proteins, shifting them towards insoluble, amyloid-like aggregations. However,  
626 not all paraspeckle components with prion-like domains investigated were found to colocalise  
627 with the inclusions, and in addition, the localisation and distribution of some proteins  
628 associated with other subnuclear bodies was altered in cells with nuclear inclusions.

629  
630 Coilin, an integral component of Cajal bodies, nucleolin, one of the most abundant proteins in  
631 the nucleolus but also found in the cytoplasm and on the cell membrane, fibrillarin, located in  
632 the dense fibrillar component of the nucleolus and SC35 (SRSF2), an essential splicing factor  
633 found in nuclear speckles all showed altered distribution in cells that have phosphorothioate  
634 AO -induced nuclear inclusions, but did not co-localize with these inclusions. Cajal bodies  
635 assemble spliceosomal and nucleolar ribonucleoproteins required for pre-mRNA and pre-  
636 rRNA processing, and are recently proposed to contribute to genome organization, with global  
637 effects on gene expression and RNA splicing (Wang *et al.* 2016). The nucleolus is the most  
638 prominent nuclear structure, and is where synthesis and processing of ribosomal transcripts to  
639 yield the mature rRNAs 5.8S, 18S and 28S from the 45S pre- rRNA takes place. We show that  
640 ribosomal RNA processing is greatly impaired by 2' O-methyl phosphorothioate AO



641 transfection, and speculate that this is a likely manifestation of improper localization of major  
642 protein components of the nucleolus and Cajal bodies and consequent disruption to their  
643 functions. In addition, the aberrant inclusions that we speculate occupy interchromosomal  
644 spaces may well impose physical constraints upon nuclear organisation, and prevent proper  
645 localisation of Cajal bodies and the nucleoli close to their normal chromosomal sites. Tissues  
646 with high demand for transcript splicing and ribosome biogenesis, and neurons in particular,  
647 have prominent Cajal bodies, juxtaposed to nucleoli (for review see (Lafarga *et al.* 2017)),  
648 and disruption or loss of Cajal bodies is associated with severe neuronal dysfunction (Tapia *et al.*  
649 *al.* 2017). Indeed, disruption or depletion of Cajal bodies was seen as the earliest nuclear sign  
650 of motor neuron degeneration in a spinal muscular atrophy mouse model and induced a  
651 progressive nucleolar dysfunction in ribosome biogenesis (Tapia *et al.* 2017).

652  
653 Paraspeckle biology has gained increasing interest due to the association of paraspeckle  
654 proteins with neurodegenerative disease, in particular amyotrophic lateral sclerosis (ALS),  
655 and the observation that *NEATI\_2* is up-regulated in early-stage motor neurons from the  
656 spinal cords of ALS patients (Shelkovnikova *et al.* 2014, Yamazaki and Hirose 2015).  
657 Paraspeckle formation, not observed in healthy spinal motor neurons, is enhanced in spinal  
658 cords of patients with early stage sporadic and familial ALS, and mutations in many  
659 paraspeckle proteins (eg. TDP-43, FUS, NONO, SFPQ) are associated with ALS (Nishimoto  
660 *et al.* 2013, Shelkovnikova *et al.* 2018). Whether paraspeckles are protective or causative in  
661 ALS molecular pathology is not known at this time (Yamazaki and Hirose 2015), nor is the  
662 role of paraspeckles in disease well understood. Nevertheless, phosphorothioate AO-  
663 mediated dysregulation of paraspeckle formation and altered nucleoli and Cajal body biology  
664 shown in our study, together with the building body of evidence that nuclear organelle  
665 dysfunction (Lafarga *et al.* 2017, Tapia *et al.* 2017) has implications for central nervous  
666 system, and probably all, clinical applications of these compounds.

667  
668 Not surprisingly, considering the altered nuclear architecture and distribution of proteins  
669 implicated in RNA biology, transcriptome sequencing showed significant global effects on the  
670 expression of transcripts and revealed disturbances to many critical cellular processes in  
671 phosphorothioate AO transfected cells. Of particular concern, pathways involved in apoptosis,  
672 chromatin silencing, cellular metabolism and a number of signalling pathways, autophagy and  
673 nucleotide excision repair were disturbed. While we acknowledge that these *in vitro* studies in

674 replicating cells may not fully reflect potential off-target treatment effects in tissues *in vivo*,  
675 Toonan et al., 2018 (Toonen *et al.* 2018) report significant upregulation of immune system-  
676 associated genes in brains of mice treated by intracerebroventricular injection of 2' O-methyl  
677 phosphorothioate AO. The upregulation of immune system associated genes was detectable for  
678 at least 2 months after the last AO administration. Here, the exaggerated sequestration of  
679 nuclear proteins as a result of 2' O-methyl phosphorothioate AO transfection dramatically  
680 disturbs RNA processing, disrupts nuclear architecture, and induces apoptosis, and it seems  
681 reasonable to consider that injection site reactions and adverse effects reported after clinical  
682 evaluation of the 2' O-methyl phosphorothioate *Drisapersen* for the treatment of Duchenne  
683 muscular dystrophy (Mendell *et al.* 2017) and *Kynamro*<sup>®</sup> (*Mipomersen*) for the treatment of  
684 familial hypercholesterolemia (Wong and Goldberg 2014) may be mediated at least in part, by  
685 non-specific interactions of nuclear components with the AO backbone. It might also be  
686 prudent to deliberate on the reported effects of antisense drugs, attributed to the AO action on  
687 the target transcript, and consider whether some level of the apparent antisense effect on  
688 splicing, in particular, could perhaps be a consequence of disturbance of RNA processing  
689 pathways more broadly.

690

691 We speculate that, unlike endogenous paraspeckles and other dynamic nuclear bodies, the  
692 formation of the aberrant nuclear inclusions seen *in vitro* here does not appear to be  
693 reversible. While 2' O-methyl phosphorothioate transfected cultures showed reduced cell  
694 numbers, whether this was due to cell death or impaired replication, or both, is uncertain, and  
695 whether the nuclear inclusions *per se* or reduced availability of RNA processing are primarily  
696 responsible requires further investigation. However, any effects resulting in perturbation of  
697 nuclear proteins may be compounded by the formation of the nuclear amyloid-like  
698 aggregates and likely disturbance of protein homeostasis, termed 'proteostasis' (Yerbury *et*  
699 *al.* 2016). Although other descriptions of exogenously induced nuclear amyloid-like  
700 aggregates are limited, Arnhold *et al.*, 2015 (Arnhold *et al.* 2015) identified large amyloid-  
701 like aggregates in SH-SY5Y cells, treated with mercury, a notorious neurotoxicant, in a study  
702 that explains the mechanism of heavy metal neurotoxicity and identified amyloid protein  
703 aggregation in the cell nucleus as causative. Mass spectrometry of the purified protein  
704 aggregates identified a subset of spliceosomal components and the nuclear envelope protein  
705 lamin B1 (Arnhold *et al.* 2015). In our study, we also detected changes in lamin B1, although  
706 here we did not detect lamin B1 in the nuclear inclusions, we nevertheless observed that

707 nuclear membrane and lamin B1 organization was distorted in fibroblasts containing nuclear  
708 inclusions. Interestingly, the multi-lobulated nuclei and lamin B1 staining are reminiscent of  
709 cells from progeria patients carrying the lamin A 433G>A mutation (E145K) (Taimen *et al.*  
710 2009).  
711

712 In summary, we report phosphorothioate backbone-specific effects of modified  
713 oligonucleotides on the distribution and localization of nuclear proteins, appearance of novel  
714 nuclear structures composed in part of a subset of paraspeckle protein components, and  
715 sequence-independent effects on nascent RNA processing. While the *in vivo*, longer term  
716 repercussions of exogenous oligonucleotide-induced nuclear protein aggregates that include  
717 many paraspeckle components and cause sub-nuclear disorganisation are yet to be  
718 determined, our observations suggest that phosphorothioate backbone antisense compounds  
719 destined for clinical application would benefit from further scrutiny.

720

## 721 **Acknowledgments**

722 The authors would like to acknowledge technical advice from Russell Johnsen. This work was  
723 performed in part during LLF's and ILP's PhD candidatures. Laboratory studies and ILP were  
724 supported by funding from the Parry Foundation through the Spinal Muscular Atrophy  
725 Association of Australia and LLF received a Team Spencer and Muscular Dystrophy WA PhD  
726 stipend. The authors received research support from the NHMRC Project Grants  
727 APP1147496, APP1086311, APP1144791 and the MNDi foundation, Western Australia.

728

## 729 **Author Contributions**

730 Conceived and designed experiments: LLF, RL, SF, MTA, ILP and AF. Performed  
731 experiments: LLF, RL, MTA, ILP, AH, and LG. Analysis of RNA-seq data: JC. Prepared and  
732 edited manuscript: LLF, SF, RL, MTA, ILP, JC, AH, LG, SDW and AF.

733 Declaration of interests: SF and SDW act as consultants to Sarepta Therapeutics and are  
734 named inventors of patents licensed through the University of Western Australia to Sarepta  
735 Therapeutics. As such, they are entitled to milestone and royalty payments that may be  
736 generated from licensing agreements and are involved in ongoing collaborative research  
737 projects with Sarepta Therapeutics.

738

739

740

## 741 **References:**

742 AM Adams, PL Harding, PL Iversen, C Coleman, S Fletcher and SD Wilton (2007).

743 **Antisense oligonucleotide induced exon skipping and the dystrophin gene**  
744 **transcript: Cocktails and chemistries.** *BMC Mol Biol* **8**: 57

745

746 F Arnhold, KH Guhrs and A von Mikecz (2015). **Amyloid domains in the cell nucleus**  
747 **controlled by nucleoskeletal protein lamin b1 reveal a new pathway of mercury**  
748 **neurotoxicity.** *PeerJ* **3**: e754.10.7717/peerj.754

- 749  
750 JK Bailey, W Shen, XH Liang and ST Crooke (2017). **Nucleic acid binding proteins affect**  
751 **the subcellular distribution of phosphorothioate antisense oligonucleotides.** *Nucleic*  
752 *Acids Res* **45**(18): 10649-10671.10.1093/nar/gkx709  
753  
754 CF Bennett, BF Baker, N Pham, E Swayze and RS Geary (2017). **Pharmacology of**  
755 **antisense drugs.** *Annu Rev Pharmacol Toxicol* **57**: 81-105.10.1146/annurev-pharmtox-  
756 010716-104846  
757  
758 CS Bond and AH Fox (2009). **Paraspeckles: Nuclear bodies built on long noncoding rna.** *J*  
759 *Cell Biol* **186**(5): 637-644.10.1083/jcb.200906113  
760  
761 M Chakravarthy, S Chen, PR Dodd and RN Veedu (2017). **Nucleic acid-based theranostics**  
762 **for tackling alzheimer's disease.** *Theranostics* **7**(16): 3933-3947.10.7150/thno.21529  
763  
764 ST Crooke, S Wang, TA Vickers, W Shen and XH Liang (2017). **Cellular uptake and**  
765 **trafficking of antisense oligonucleotides.** *Nat Biotechnol* **35**(3): 230-  
766 237.10.1038/nbt.3779  
767  
768 N Dias and CA Stein (2002). **Potential roles of antisense oligonucleotides in cancer**  
769 **therapy. The example of bcl-2 antisense oligonucleotides.** *Eur J Pharm Biopharm*  
770 **54**(3): 263-269  
771  
772 S Fletcher, K Honeyman, AM Fall, PL Harding, RD Johnsen and SD Wilton (2006).  
773 **Dystrophin expression in the mdx mouse after localised and systemic administration**  
774 **of a morpholino antisense oligonucleotide.** *J Gene Med* **8**(2): 207-216  
775  
776 U Flierl, TL Nero, B Lim, JF Arthur, Y Yao, SM Jung, E Gitz, AY Pollitt, MT Zaldivia, M  
777 Jandrot-Perrus, A Schafer, B Nieswandt, RK Andrews, MW Parker, EE Gardiner and K  
778 Peter (2015). **Phosphorothioate backbone modifications of nucleotide-based drugs**  
779 **are potent platelet activators.** *J Exp Med* **212**(2): 129-137.10.1084/jem.20140391  
780  
781 AH Fox, S Nakagawa, T Hirose and CS Bond (2018). **Paraspeckles: Where long noncoding**  
782 **rna meets phase separation.** *Trends Biochem Sci* **43**(2): 124-  
783 135.10.1016/j.tibs.2017.12.001  
784  
785 BL Gebiski, CJ Mann, S Fletcher and SD Wilton (2003). **Morpholino antisense**  
786 **oligonucleotide induced dystrophin exon 23 skipping in mdx mouse muscle.** *Hum*  
787 *Mol Genet* **12**(15): 1801-1811  
788  
789 L Jiang, C Shao, QJ Wu, G Chen, J Zhou, B Yang, H Li, LT Gou, Y Zhang, Y Wang, GW Yeo,  
790 Y Zhou and XD Fu (2017). **Neat1 scaffolds rna-binding proteins and the**  
791 **microprocessor to globally enhance pri-mirna processing.** *Nat Struct Mol Biol* **24**(10):  
792 816-824.10.1038/nsmb.3455  
793  
794 M Kinali, V Arechavala-Gomez, L Feng, S Cirak, D Hunt, C Adkin, M Guglieri, E Ashton, S  
795 Abbs, P Nihoyannopoulos, ME Garralda, M Rutherford, C McCulley, L Popplewell, IR  
796 Graham, G Dickson, MJ Wood, DJ Wells, SD Wilton, R Kole, V Straub, K Bushby, C  
797 Sewry, JE Morgan and F Muntoni (2009). **Local restoration of dystrophin expression**  
798 **with the morpholino oligomer avi-4658 in duchenne muscular dystrophy: A single-**

- 799 **blind, placebo-controlled, dose-escalation, proof-of-concept study.** *Lancet Neurol*  
800 **8(10): 918-928.S1474-4422(09)70211-X [pii] 10.1016/S1474-4422(09)70211-X**  
801
- 802 M Lafarga, O Tapia, AM Romero and MT Berciano (2017). **Cajal bodies in neurons.** *RNA*  
803 *Biol* **14(6): 712-725.10.1080/15476286.2016.1231360**  
804
- 805 AK Lancaster, A Nutter-Upham, S Lindquist and OD King (2014). **Plaac: A web and**  
806 **command-line application to identify proteins with prion-like amino acid**  
807 **composition.** *Bioinformatics* **30(17): 2501-2502.10.1093/bioinformatics/btu310**  
808
- 809 R Li, AR Harvey, SI Hodgetts and AH Fox (2017). **Functional dissection of neat1 using**  
810 **genome editing reveals substantial localization of the neat1\_1 isoform outside**  
811 **paraspeckles.** *RNA* **23(6): 872-881.10.1261/rna.059477.116**  
812
- 813 S Li, FJ Shu, Z Li, L Jaafar, S Zhao and WS Dynan (2017). **Cell-type specific role of the**  
814 **rna-binding protein, nono, in the DNA double-strand break response in the mouse**  
815 **testes.** *DNA Repair (Amst)* **51: 70-78.10.1016/j.dnarep.2017.02.002**  
816
- 817 XH Liang, H Sun, W Shen and ST Crooke (2015). **Identification and characterization of**  
818 **intracellular proteins that bind oligonucleotides with phosphorothioate linkages.**  
819 *Nucleic Acids Res* **43(5): 2927-2945.10.1093/nar/gkv143**  
820
- 821 F Lipi, S Chen, M Chakravarthy, S Rakesh and RN Veedu (2016). **In vitro evolution of**  
822 **chemically-modified nucleic acid aptamers: Pros and cons, and comprehensive**  
823 **selection strategies.** *RNA Biol* **13(12): 1232-1245.10.1080/15476286.2016.1236173**  
824
- 825 JR Mendell, N Goemans, LP Lowes, LN Alfano, K Berry, J Shao, EM Kaye, E Mercuri, G  
826 Eteplirsen Study and DMDIN Telethon Foundation (2016). **Longitudinal effect of**  
827 **eteplirsen versus historical control on ambulation in duchenne muscular dystrophy.**  
828 *Ann Neurol* **79(2): 257-271.10.1002/ana.24555**  
829
- 830 JR Mendell, LR Rodino-Klapac, Z Sahenk, K Roush, L Bird, LP Lowes, L Alfano, AM  
831 Gomez, S Lewis, J Kota, V Malik, K Shontz, CM Walker, KM Flanigan, M Corridore, JR  
832 Kean, HD Allen, C Shilling, KR Melia, P Sazani, JB Saoud, EM Kaye and G Eteplirsen  
833 Study (2013). **Eteplirsen for the treatment of duchenne muscular dystrophy.** *Ann*  
834 *Neurol* **74(5): 637-647.10.1002/ana.23982**  
835
- 836 JR Mendell, Z Sahenk and L Rodino-Klapac (2017). **Clinical trials of exon skipping in**  
837 **duchenne muscular dystrophy.** *Expert Opinion on Orphan Drugs* **5(9): 683-690.DOI:**  
838 **10.1080/21678707.2017.1366310**  
839
- 840 C Mitrpant, P Porensky, H Zhou, L Price, F Muntoni, S Fletcher, SD Wilton and AH Burghes  
841 (2013). **Improved antisense oligonucleotide design to suppress aberrant smn2 gene**  
842 **transcript processing: Towards a treatment for spinal muscular atrophy.** *PLoS One*  
843 **8(4): e62114.10.1371/journal.pone.0062114**  
844
- 845 T Naganuma, S Nakagawa, A Tanigawa, YF Sasaki, N Goshima and T Hirose (2012).  
846 **Alternative 3'-end processing of long noncoding rna initiates construction of nuclear**  
847 **paraspeckles.** *EMBO J* **31(20): 4020-4034.10.1038/emboj.2012.251**  
848

- 849 Y Nishimoto, S Nakagawa, T Hirose, HJ Okano, M Takao, S Shibata, S Suyama, K Kuwako,  
850 T Imai, S Murayama, N Suzuki and H Okano (2013). **The long non-coding rna nuclear-**  
851 **enriched abundant transcript 1\_2 induces paraspeckle formation in the motor**  
852 **neuron during the early phase of amyotrophic lateral sclerosis.** *Mol Brain* **6**:  
853 31.10.1186/1756-6606-6-31  
854
- 855 DM Paton (2017). **Nusinersen: Antisense oligonucleotide to increase smn protein**  
856 **production in spinal muscular atrophy.** *Drugs Today (Barc)* **53**(6): 327-  
857 337.10.1358/dot.2017.53.6.2652413  
858
- 859 TA Shelkovernikova, MS Kukharsky, H An, P Dimasi, S Alexeeva, O Shabir, PR Heath and VL  
860 Buchman (2018). **Protective paraspeckle hyper-assembly downstream of tdp-43 loss**  
861 **of function in amyotrophic lateral sclerosis.** *Mol Neurodegener* **13**(1):  
862 30.10.1186/s13024-018-0263-7  
863
- 864 TA Shelkovernikova, HK Robinson, C Troakes, N Ninkina and VL Buchman (2014).  
865 **Compromised paraspeckle formation as a pathogenic factor in fusopathies.** *Human*  
866 *Molecular Genetics* **23**(9): 2298-2312.10.1093/hmg/ddt622  
867
- 868 L Shen, A Frazer-Abel, PR Reynolds, PC Giclas, A Chappell, MK Pangburn, H Younis and SP  
869 Henry (2014). **Mechanistic understanding for the greater sensitivity of monkeys to**  
870 **antisense oligonucleotide-mediated complement activation compared with humans.**  
871 *J Pharmacol Exp Ther* **351**(3): 709-717.10.1124/jpet.114.219378  
872
- 873 W Shen, CL De Hoyos, H Sun, TA Vickers, XH Liang and ST Crooke (2018). **Acute**  
874 **hepatotoxicity of 2' fluoro-modified 5-10-5 gapmer phosphorothioate**  
875 **oligonucleotides in mice correlates with intracellular protein binding and the loss of**  
876 **dbhs proteins.** *Nucleic Acids Res* **46**(5): 2204-2217.10.1093/nar/gky060  
877
- 878 W Shen, XH Liang and ST Crooke (2014). **Phosphorothioate oligonucleotides can displace**  
879 **neat1 rna and form nuclear paraspeckle-like structures.** *Nucleic Acids Res* **42**(13):  
880 8648-8662.10.1093/nar/gku579  
881
- 882 W Shen, XH Liang, H Sun and ST Crooke (2015). **2'-fluoro-modified phosphorothioate**  
883 **oligonucleotide can cause rapid degradation of p54nrb and psf.** *Nucleic Acids Res*  
884 **43**(9): 4569-4578.10.1093/nar/gkv298  
885
- 886 NK Singh, NN Singh, EJ Androphy and RN Singh (2006). **Splicing of a critical exon of**  
887 **human survival motor neuron is regulated by a unique silencer element located in**  
888 **the last intron.** *Mol Cell Biol* **26**(4): 1333-1346.10.1128/MCB.26.4.1333-1346.2006  
889
- 890 CA Stein and D Castanotto (2017). **Fda-approved oligonucleotide therapies in 2017.** *Mol*  
891 *Ther* **25**(5): 1069-1075.10.1016/j.yymthe.2017.03.023  
892
- 893 P Taimen, K Pfliegerhaer, T Shimi, D Moller, K Ben-Harush, MR Erdos, SA Adam, H  
894 Herrmann, O Medalia, FS Collins, AE Goldman and RD Goldman (2009). **A progeria**  
895 **mutation reveals functions for lamin a in nuclear assembly, architecture, and**  
896 **chromosome organization.** *Proc Natl Acad Sci U S A* **106**(49): 20788-  
897 20793.10.1073/pnas.0911895106  
898

- 899 O Tapia, JO Narcis, J Riancho, O Tarabal, L Piedrafita, J Caldero, MT Berciano and M  
900 Lafarga (2017). **Cellular bases of the rna metabolism dysfunction in motor neurons**  
901 **of a murine model of spinal muscular atrophy: Role of cajal bodies and the**  
902 **nucleolus.** *Neurobiol Dis* **108**: 83-99.10.1016/j.nbd.2017.08.004  
903
- 904 LJA Toonen, J Casaca-Carreira, M Pellise-Tintore, H Mei, Y Temel, A Jahanshahi and WMC  
905 van Roon-Mom (2018). **Intracerebroventricular administration of a 2'-o-methyl**  
906 **phosphorothioate antisense oligonucleotide results in activation of the innate**  
907 **immune system in mouse brain.** *Nucleic Acid Ther* **28**(2): 63-73.10.1089/nat.2017.0705  
908
- 909 B Tri Le, RN Veedu, S Fletcher and SD Wilton (2016). **Antisense oligonucleotide**  
910 **development for the treatment of muscular dystrophies.** *Expert Opinion on Orphan*  
911 *Drugs* **4**(2): 139-152.10.1517/21678707.2016.1122517  
912
- 913 RN Veedu (2015). **Medicinal chemistry of aptamers.** *Curr Top Med Chem* **15**(12): 1065  
914
- 915 Q Wang, IA Sawyer, MH Sung, D Sturgill, SP Shevtsov, G Pegoraro, O Hakim, S Baek, GL  
916 Hager and M Dundr (2016). **Cajal bodies are linked to genome conformation.** *Nat*  
917 *Commun* **7**: 10966.10.1038/ncomms10966  
918
- 919 SD Wilton, RN Veedu and S Fletcher (2015). **The emperor's new dystrophin: Finding**  
920 **sense in the noise.** *Trends Mol Med* **21**(7): 417-426.10.1016/j.molmed.2015.04.006  
921
- 922 J Winkler, M Stessl, J Amartey and CR Noe (2010). **Off-target effects related to the**  
923 **phosphorothioate modification of nucleic acids.** *ChemMedChem* **5**(8): 1344-  
924 1352.10.1002/cmdc.201000156  
925
- 926 E Wong and T Goldberg (2014). **Mipomersen (kynamro): A novel antisense**  
927 **oligonucleotide inhibitor for the management of homozygous familial**  
928 **hypercholesterolemia.** *P T* **39**(2): 119-122  
929
- 930 T Yamazaki and T Hirose (2015). **The building process of the functional paraspeckle with**  
931 **long non-coding rnas.** *Front Biosci (Elite Ed)* **7**: 1-41  
932
- 933 JJ Yerbury, L Ooi, A Dillin, DN Saunders, DM Hatters, PM Beart, NR Cashman, MR Wilson  
934 and H Ecroyd (2016). **Walking the tightrope: Proteostasis and neurodegenerative**  
935 **disease.** *Journal of Neurochemistry* **137**(4): 489-505.10.1111/jnc.13575  
936
- 937
- 938
