# Supplementary material for: Interaction of modified oligonucleotides with nuclear proteins, formation of novel nuclear structures and sequence-independent effects on RNA processing
Source: bioRxiv or medRxiv preprint supplement (doi:10.1101/446773), 2019-03-04
Supplement: Supplementary file [file 446773-1.pdf]

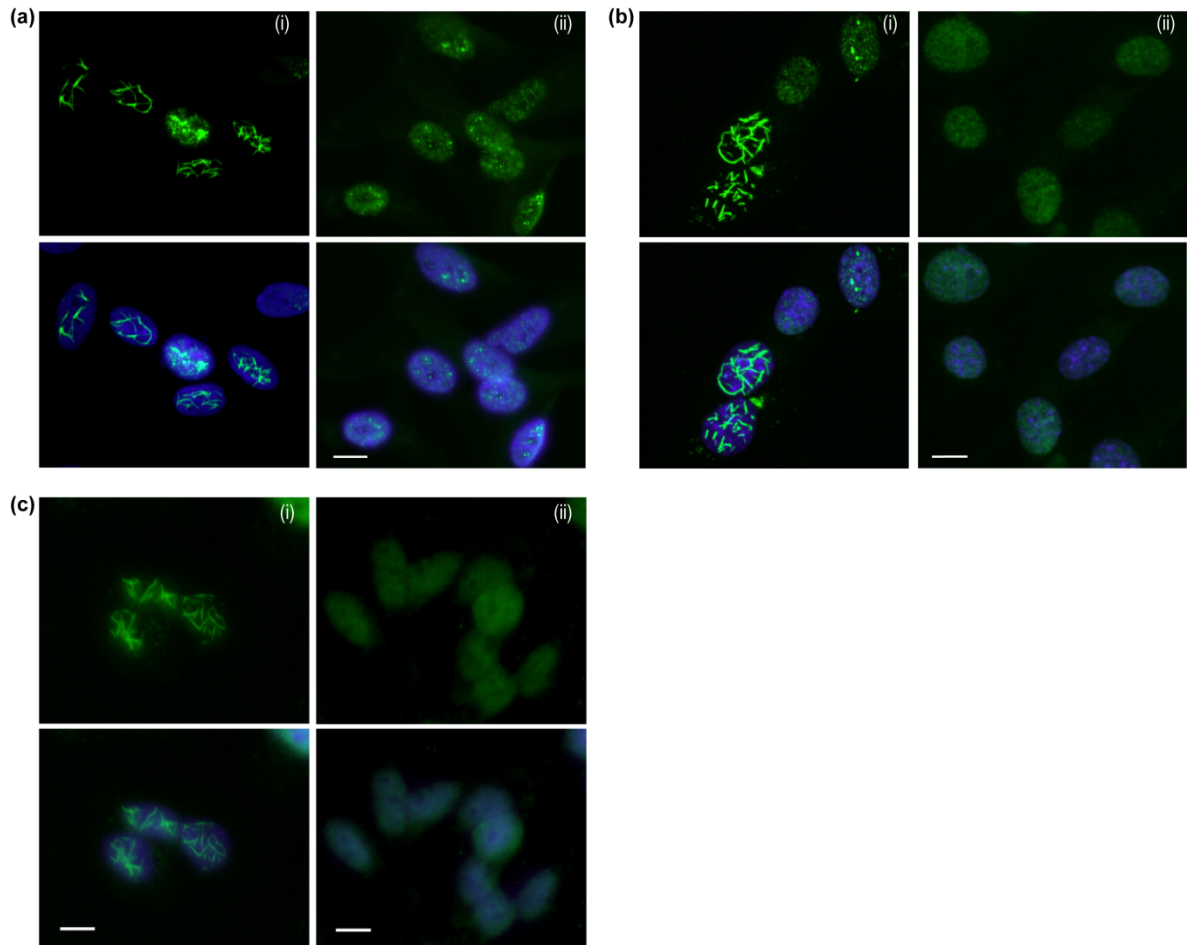

**Supplementary Figure 1** fluorescence staining of paraspeckle proteins following 2' O-methyl phosphorothioate AO transfection in additional cell types, including **(a)** primary human myogenic cells; **(b)** mouse myogenic cells; and **(c)** the SH-SY5Y neuroblastoma cell line; with (i) 2' O-methyl phosphorothioate-transfected and (ii) untreated shown in each panel. NONO was immunostained in human cells and SFPQ in mouse cells. Scale bar = 10  $\mu$ m.

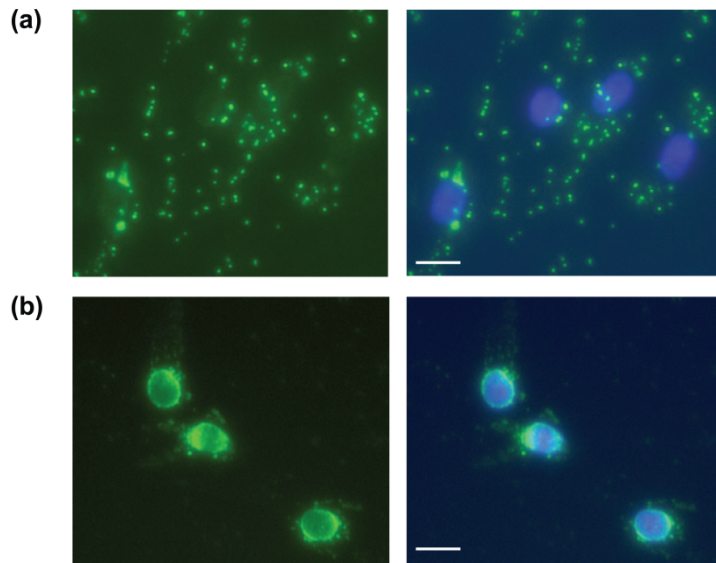

**Supplementary Figure 2** Overlaid hoechst and SFPQ staining of fibroblasts following 2'O-methyl phosphorothioate transfection (100 nM, 24 hours), showing **(a)** cytoplasmic SFPQ staining in cells without nuclear inclusions; and **(b)** staining of SFPQ around the nuclear envelope in cells without nuclear inclusions. Scale bar = 10  $\mu$ m.

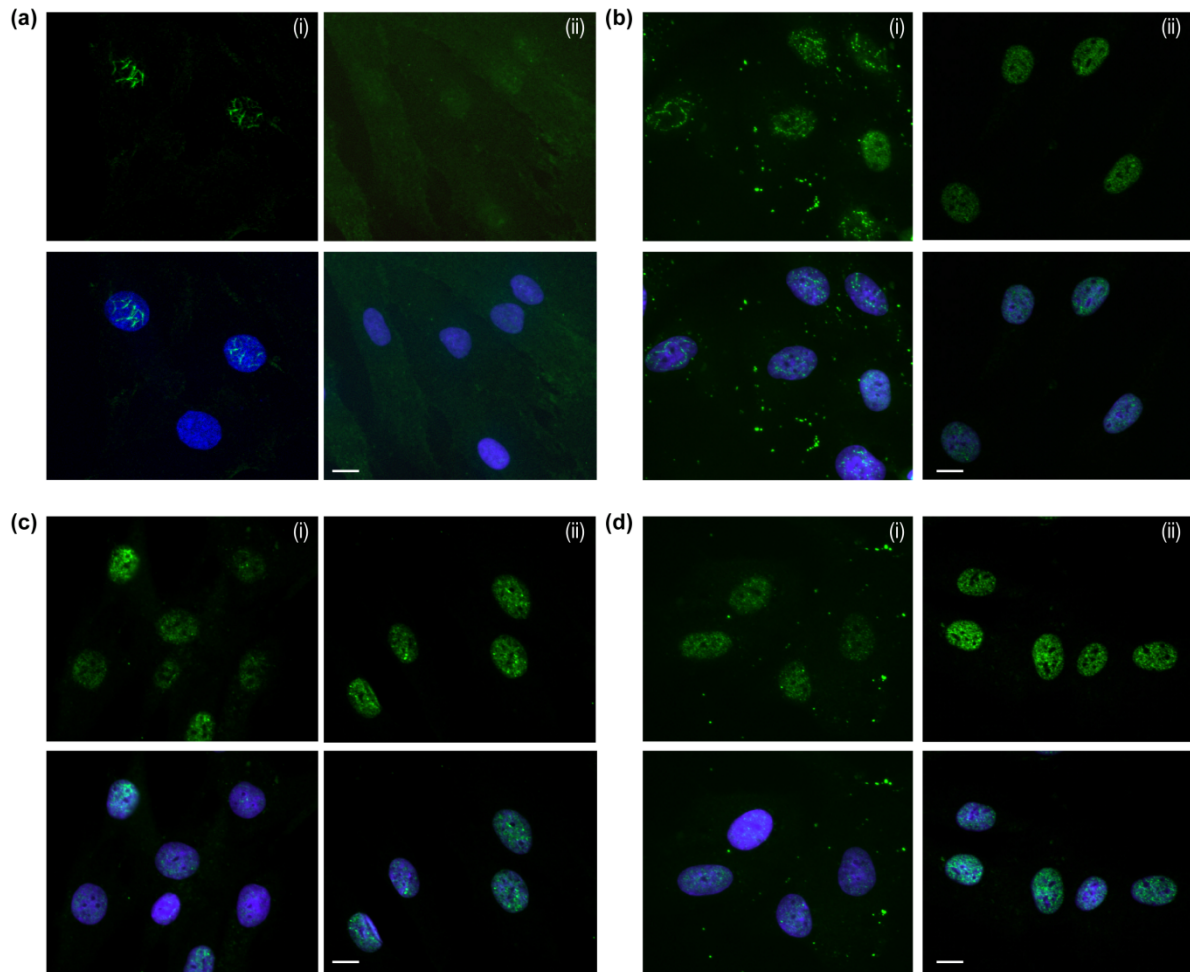

**Supplementary Figure 3** Immunofluorescent staining of paraspeckle proteins following 2' O-methyl phosphorothioate transfection (100 nM for 24 hours), showing **(a)** paraspeckle protein component 1 (PSPC1); **(b)** fused in sarcoma (FUS); **(c)** TAR-DNA binding protein 43 (TDP43); and **(d)** heterogeneous nuclear ribonucleoprotein A1 (hnRNPA1); in (i) 2' O-methyl transfected and (ii) untreated cells shown in each panel. Scale bar = 10  $\mu$ m.

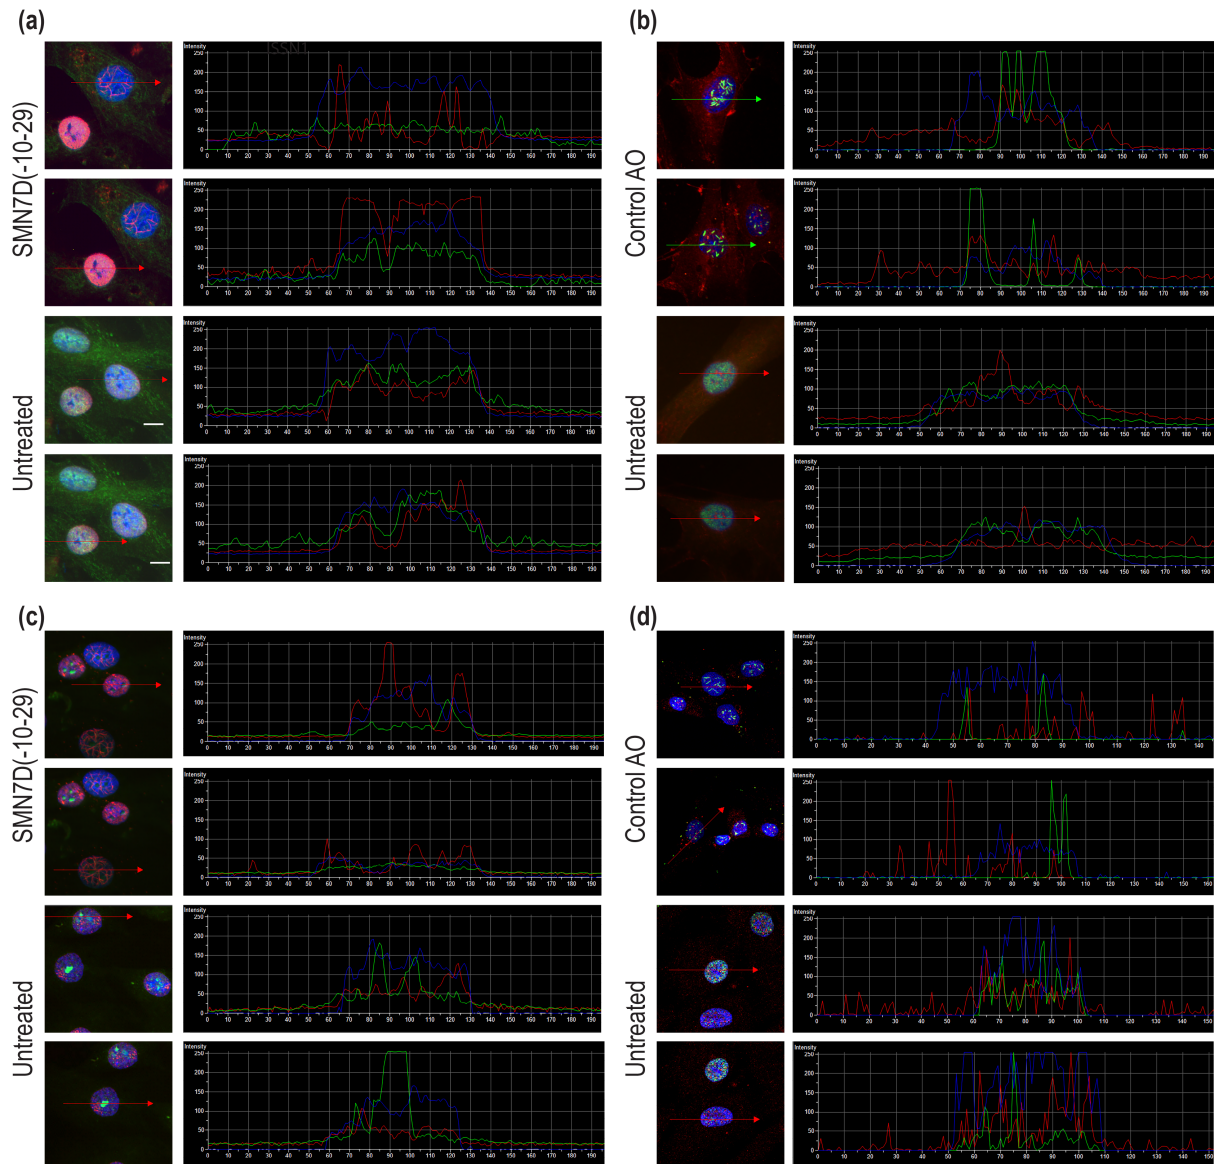

**Supplementary Figure 4** Immunofluorescent staining of paraspeckle proteins following transfection of the 2' O-methyl phosphorothioate SMN7D(-10-29) (a, c) and Control AOs (b, d) (100 nM for 24 hours) and intensity profiling of selected cells showing (a) SFPQ (red) and SC35 (green); (b) NONO (green) and FBL (red); (c) SFPQ (red) and NCL (green); (d) NONO (green) and coilin (red).

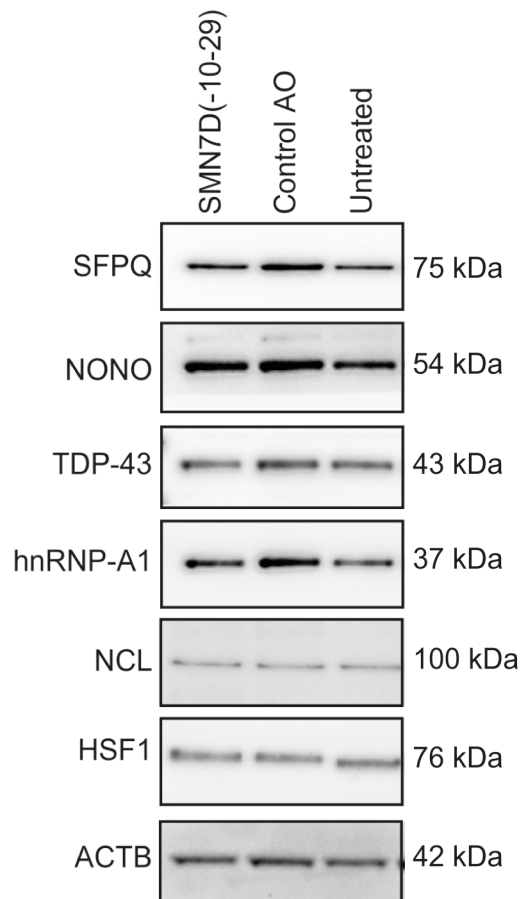

**Supplementary Figure 5** Western blots of extracts from cells transfected with the 2' O-methyl phosphorothioate *SMN7D(-10-29)* and Control AOs (100 nM for 24 hours), probed with antibodies that recognize SFPQ, NONO, TDP-43, hnRNP-A1, NCL, HSF1 and ACTB (Supplementary Table 2).

**Supplementary Tables:**

**Supplementary Table 1** primer sequences and PCR conditions used in this study.

| Primers     | Concentration/amount of primer per reaction | Sequence 5'-3'                                           | Temperature profile                                                                 |
|-------------|---------------------------------------------|----------------------------------------------------------|-------------------------------------------------------------------------------------|
| <i>SMN</i>  | 25 ng                                       | AGGTCTCCTGGAAATAAATCAG<br>TGGTGTCATTTAGTGCTGCTCT         | 55°C 30 min<br>94°C 2 min<br>25 cycles:<br>94°C 40 sec<br>56°C 30 sec<br>68°C 1 min |
| <i>BCL2</i> | 25 ng                                       | AAT GTC TCA GAG CAA CCG GG<br>GGG AGG GTA GAG TGG ATG GT | 55°C 30 min<br>94°C 2 min<br>25 cycles:<br>94°C 40 sec<br>60°C 30 sec<br>68°C 1 min |
| <i>5S</i>   | 50 nM                                       | GGC CAT ACC ACC CTG AAC GC<br>CAG CAC CCG GTA TTC CCA GG | 95 °C 20 sec<br>40 cycles<br>95 °C 3 sec<br>60 °C 30 sec                            |
| <i>18S</i>  | 250 nM                                      | GTA ACC CGT TGA ACC CCA TT<br>CCA TCC AAT CGG TAG TAG CG |                                                                                     |
| <i>45S</i>  | 100 nM                                      | TGT CAG GCG TTC TCG TCT C<br>AGC ACG ACG TCA CCA CAT C   |                                                                                     |
| <i>TBP</i>  | 500 nM                                      | TCAGGCGTTCGGTGGATCGAGT<br>AGTGATGCTGGGCACTGCGGAGAA       |                                                                                     |
| <i>TUBB</i> | 100 nM                                      | CTT CGG CCA GAT CTT CAG AC<br>AGA GAG TGG GTC AGC TGG AA |                                                                                     |

**Supplementary Table 2** Antibodies used in this study, indicating dilutions used and detection method.

| Protein  | Protein name                               | Supplier            | Catalogue # | Dilution |         | Conjugate |
|----------|--------------------------------------------|---------------------|-------------|----------|---------|-----------|
|          |                                            |                     |             | IF       | WB      |           |
| NONO     | Non-POU domain containing octamer          | Made in house       | NA          | 1:1000   | 1:10000 | mouse     |
| SFPQ     | Splicing factor proline & glutamine rich   | Abcam               | Ab38148     | 1:1000   | 1:8000  | rabbit    |
| PSPC1    | paraspeckle protein component 1            | Merck Millipore     | HPA038904   | 1:50     | NA      | mouse     |
| FUS      | Fused in sarcoma                           | Santa Cruz          | Sc-47711    | 1:500    | NA      | mouse     |
| TDP-43   | TAR-DNA binding protein 43                 | Protein Tech        | 10782-2-AP  | 1:300    | 1:3000  | rabbit    |
| hnRNP-A1 | Heterogeneous nuclear ribonucleoprotein A1 | Thermo Scientific   | PA5-19431   | 1:700    | 1:2000  | rabbit    |
| NCL      | Nucleolin                                  | Thermo Scientific   | 39-6400     | 1:250    | 1:2000  | mouse     |
| FBL      | Fibrillarin                                | Cell Signalling     | 2639        | 1:400    | NA      | rabbit    |
| COIL     | Coilin                                     | Sapphire Bioscience | GTX1125710  | 1:250    | NA      | rabbit    |

|       |                      |                 |              |        |         |        |
|-------|----------------------|-----------------|--------------|--------|---------|--------|
| LMNB1 | Lamin B1             | Protein Tech    | 12987-1-AP   | 1:500  | NA      | rabbit |
| SC35  | Splicing factor SC35 | Merk Millipore  | 04-1550      | 1:1000 | NA      | mouse  |
| HSF1  | Heat shock factor 1  | Cell Signalling | 12972        | 1:400  | 1:500   | rabbit |
| ACTB  | Beta actin           | Sigma           | A5441        | NA     | 1:60000 | mouse  |
| P53   | Tumor Protein 53     | Novocasta       | NCL-Lp53-D07 | NA     | 1:1000  | mouse  |

**Supplementary Table 3** Results of SFPQ immunostaining following transfection of fibroblasts with 2' O-methyl phosphorothioate AOs (100 nM, 24 hours). The nucleotide composition and length of each AO is indicated. Cells were stained for SFPQ and the percentages of cells with nuclear inclusions recorded, as was the percentage of cells showing cytoplasmic SFPQ aggregation.

| AO # | Nucleotide composition |    |    |    | Length | Cells with nuclear inclusions | Total cell number | SFPQ-positive nuclear inclusions | Cytoplasmic SFPQ staining | Comments |
|------|------------------------|----|----|----|--------|-------------------------------|-------------------|----------------------------------|---------------------------|----------|
|      | A                      | C  | G  | U  |        |                               |                   |                                  |                           |          |
| 1    | 4                      | 9  | 4  | 8  | 25     | 56                            | 56                | 100.0                            |                           |          |
| 2    | 5                      | 9  | 3  | 8  | 25     | 60                            | 60                | 100.0                            |                           |          |
| 3    | 3                      | 8  | 3  | 11 | 25     | 107                           | 109               | 98.2                             |                           |          |
| 4    | 4                      | 10 | 3  | 8  | 25     | 87                            | 89                | 97.8                             |                           |          |
| 5    | 4                      | 8  | 7  | 6  | 25     | 118                           | 121               | 97.5                             | >90%                      |          |
| 6    | 5                      | 11 | 4  | 5  | 25     | 95                            | 98                | 96.9                             |                           |          |
| 7    | 6                      | 7  | 8  | 4  | 25     | 29                            | 30                | 96.7                             |                           |          |
| 8    | 4                      | 9  | 3  | 9  | 25     | 112                           | 116               | 96.6                             |                           |          |
| 9    | 4                      | 7  | 3  | 11 | 25     | 76                            | 79                | 96.2                             |                           |          |
| 10   | 7                      | 2  | 7  | 9  | 25     | 70                            | 73                | 95.9                             |                           |          |
| 11   | 6                      | 2  | 3  | 14 | 25     | 128                           | 134               | 95.5                             |                           |          |
| 12   | 7                      | 8  | 3  | 7  | 25     | 63                            | 66                | 95.5                             |                           |          |
| 13   | 7                      | 7  | 3  | 8  | 25     | 55                            | 58                | 94.8                             |                           |          |
| 14   | 10                     | 10 | 5  | 2  | 27     | 78                            | 84                | 92.9                             |                           |          |
| 15   | 10                     | 7  | 2  | 6  | 25     | 130                           | 140               | 92.9                             |                           |          |
| 16   | 4                      | 9  | 2  | 9  | 24     | 122                           | 132               | 92.4                             |                           |          |
| 17   | 11                     | 3  | 9  | 7  | 30     | 101                           | 110               | 91.8                             |                           |          |
| 18   | 5                      | 10 | 4  | 6  | 25     | 52                            | 57                | 91.2                             |                           |          |
| 19   | 4                      | 6  | 8  | 7  | 25     | 29                            | 32                | 90.6                             |                           |          |
| 20   | 1                      | 12 | 0  | 12 | 25     | 33                            | 37                | 89.2                             |                           |          |
| 21   | 15                     | 2  | 3  | 2  | 22     | 44                            | 50                | 88.0                             |                           |          |
| 22   | 11                     | 3  | 10 | 2  | 26     | 109                           | 124               | 87.9                             | >90%                      |          |
| 23   | 6                      | 6  | 4  | 4  | 20     | 95                            | 111               | 85.6                             |                           |          |
| 24   | 7                      | 8  | 2  | 8  | 25     | 53                            | 63                | 84.1                             |                           |          |
| 25   | 4                      | 9  | 2  | 11 | 26     | 118                           | 142               | 83.1                             |                           |          |
| 26   | 7                      | 8  | 3  | 7  | 25     | 90                            | 109               | 82.6                             |                           |          |
| 27   | 5                      | 7  | 8  | 6  | 26     | 98                            | 119               | 82.4                             |                           |          |
| 28   | 3                      | 9  | 8  | 5  | 25     | 98                            | 120               | 81.7                             |                           |          |
| 29   | 3                      | 14 | 6  | 3  | 26     | 40                            | 50                | 80.0                             |                           |          |
| 30   | 3                      | 7  | 7  | 8  | 25     | 57                            | 72                | 79.2                             |                           |          |
| 31   | 0                      | 8  | 3  | 14 | 25     | 88                            | 113               | 77.9                             |                           |          |
| 32   | 6                      | 9  | 5  | 5  | 25     | 109                           | 140               | 77.9                             |                           |          |
| 33   | 18                     | 2  | 6  | 3  | 29     | 100                           | 129               | 77.5                             |                           |          |
| 34   | 6                      | 7  | 5  | 7  | 25     | 62                            | 81                | 76.5                             |                           |          |
| 35   | 3                      | 10 | 3  | 12 | 28     | 104                           | 136               | 76.5                             |                           |          |
| 36   | 14                     | 5  | 5  | 4  | 28     | 26                            | 35                | 74.3                             |                           |          |



|    |    |    |    |    |    |     |     |      |      |  |
|----|----|----|----|----|----|-----|-----|------|------|--|
| 37 | 3  | 9  | 6  | 7  | 25 | 56  | 77  | 72.7 |      |  |
| 38 | 10 | 7  | 4  | 4  | 25 | 52  | 72  | 72.2 |      |  |
| 39 | 9  | 8  | 4  | 4  | 25 | 114 | 159 | 71.7 | >90% |  |
| 40 | 5  | 7  | 5  | 8  | 25 | 77  | 108 | 71.3 |      |  |
| 41 | 1  | 9  | 4  | 4  | 18 | 72  | 109 | 66.1 |      |  |
| 42 | 8  | 4  | 9  | 4  | 25 | 83  | 126 | 65.9 | >90% |  |
| 43 | 3  | 10 | 8  | 4  | 25 | 86  | 131 | 65.6 | >90% |  |
| 44 | 9  | 3  | 10 | 3  | 25 | 75  | 115 | 65.2 | >90% |  |
| 45 | 8  | 4  | 7  | 6  | 25 | 47  | 74  | 63.5 |      |  |
| 46 | 6  | 7  | 2  | 10 | 25 | 100 | 158 | 63.3 |      |  |
| 47 | 10 | 3  | 5  | 7  | 25 | 65  | 103 | 63.1 |      |  |
| 48 | 7  | 6  | 10 | 2  | 25 | 72  | 115 | 62.6 | >90% |  |
| 49 | 7  | 7  | 8  | 11 | 33 | 25  | 40  | 62.5 |      |  |
| 50 | 6  | 4  | 8  | 2  | 20 | 83  | 137 | 60.6 | >90% |  |
| 51 | 4  | 8  | 6  | 7  | 25 | 54  | 93  | 58.1 |      |  |
| 52 | 1  | 10 | 11 | 8  | 30 | 36  | 62  | 58.1 |      |  |
| 53 | 2  | 7  | 8  | 8  | 25 | 78  | 138 | 56.5 |      |  |
| 54 | 6  | 8  | 6  | 5  | 25 | 55  | 100 | 55.0 |      |  |
| 55 | 7  | 5  | 8  | 4  | 24 | 68  | 125 | 54.4 |      |  |
| 56 | 8  | 4  | 7  | 6  | 25 | 60  | 112 | 53.6 |      |  |
| 57 | 5  | 7  | 6  | 7  | 25 | 40  | 77  | 51.9 |      |  |
| 58 | 6  | 9  | 6  | 5  | 26 | 95  | 187 | 50.8 |      |  |
| 59 | 8  | 4  | 5  | 8  | 25 | 34  | 67  | 50.7 |      |  |
| 60 | 6  | 5  | 6  | 8  | 25 | 99  | 207 | 47.8 |      |  |
| 61 | 6  | 3  | 13 | 3  | 25 | 23  | 49  | 46.9 | >90% |  |
| 62 | 9  | 4  | 9  | 3  | 25 | 41  | 89  | 46.1 | >90% |  |
| 63 | 8  | 7  | 7  | 3  | 25 | 55  | 121 | 45.5 |      |  |
| 64 | 6  | 1  | 6  | 11 | 24 | 65  | 146 | 44.5 |      |  |
| 65 | 3  | 7  | 8  | 7  | 25 | 57  | 134 | 42.5 |      |  |
| 66 | 11 | 9  | 3  | 8  | 31 | 44  | 104 | 42.3 |      |  |
| 67 | 3  | 10 | 7  | 5  | 25 | 22  | 55  | 40.0 |      |  |
| 68 | 6  | 7  | 9  | 3  | 25 | 48  | 122 | 39.3 | >90% |  |
| 69 | 2  | 9  | 13 | 1  | 25 | 43  | 114 | 37.7 | >90% |  |
| 70 | 2  | 7  | 6  | 4  | 19 | 45  | 123 | 36.6 |      |  |
| 71 | 6  | 7  | 9  | 3  | 25 | 36  | 104 | 34.6 |      |  |
| 72 | 5  | 6  | 3  | 0  | 14 | 45  | 132 | 34.1 |      |  |
| 73 | 9  | 7  | 5  | 4  | 25 | 30  | 90  | 33.3 |      |  |
| 74 | 6  | 3  | 7  | 9  | 25 | 29  | 88  | 33.0 | >90% |  |
| 75 | 5  | 10 | 8  | 2  | 25 | 52  | 160 | 32.5 |      |  |
| 76 | 5  | 6  | 4  | 5  | 20 | 17  | 59  | 28.8 |      |  |
| 77 | 6  | 6  | 8  | 1  | 21 | 33  | 115 | 28.7 |      |  |
| 78 | 5  | 6  | 7  | 7  | 25 | 33  | 117 | 28.2 |      |  |
| 79 | 3  | 8  | 5  | 9  | 25 | 39  | 143 | 27.3 |      |  |
| 80 | 3  | 5  | 12 | 5  | 25 | 26  | 96  | 27.1 | >90% |  |
| 81 | 7  | 8  | 7  | 3  | 25 | 21  | 78  | 26.9 |      |  |
| 82 | 6  | 4  | 9  | 6  | 25 | 32  | 122 | 26.2 | >90% |  |

|      |   |    |    |   |    |    |     |             |      |                                                      |
|------|---|----|----|---|----|----|-----|-------------|------|------------------------------------------------------|
| 83   | 4 | 10 | 6  | 5 | 25 | 40 | 156 | <b>25.6</b> |      |                                                      |
| 84   | 4 | 8  | 10 | 2 | 24 | 30 | 131 | <b>22.9</b> |      |                                                      |
| 85   | 4 | 5  | 9  | 5 | 23 | 15 | 134 | <b>11.2</b> | >90% |                                                      |
| 86   | 4 | 3  | 8  | 4 | 19 | 10 | 138 | <b>7.2</b>  | >90% |                                                      |
| 87   | 2 | 4  | 11 | 8 | 25 | 8  | 146 | <b>5.5</b>  | >90% |                                                      |
| 88   | 6 | 6  | 12 | 3 | 27 | 3  | 169 | <b>1.8</b>  | >90% |                                                      |
| 89   | 9 | 4  | 11 | 1 | 25 | 2  | 161 | <b>1.2</b>  | >90% |                                                      |
| 90   | 3 | 4  | 12 | 6 | 25 | 0  | 85  | <b>0.0</b>  |      | 25% of cells show SFPQ localised to nuclear envelope |
| UT 1 |   |    |    |   |    | 0  | 122 | <b>0.0</b>  |      |                                                      |
| UT 2 |   |    |    |   |    | 0  | 85  | <b>0.0</b>  |      |                                                      |

Supplementary File 1 – intensity profiling analysis

Supplementary File 2 – All raw RNAseq data

Supplementary File 3 / Supplementary table 4 – GO network terms for Figure 6b
